# Supplementary material for: Synthesis of cyanooxovanadate and cyanosilylation of ketones
Source: Royal Society of Chemistry journal article supplement (doi:10.1039/d1ra05879g), 2021-01-01

## GC chart

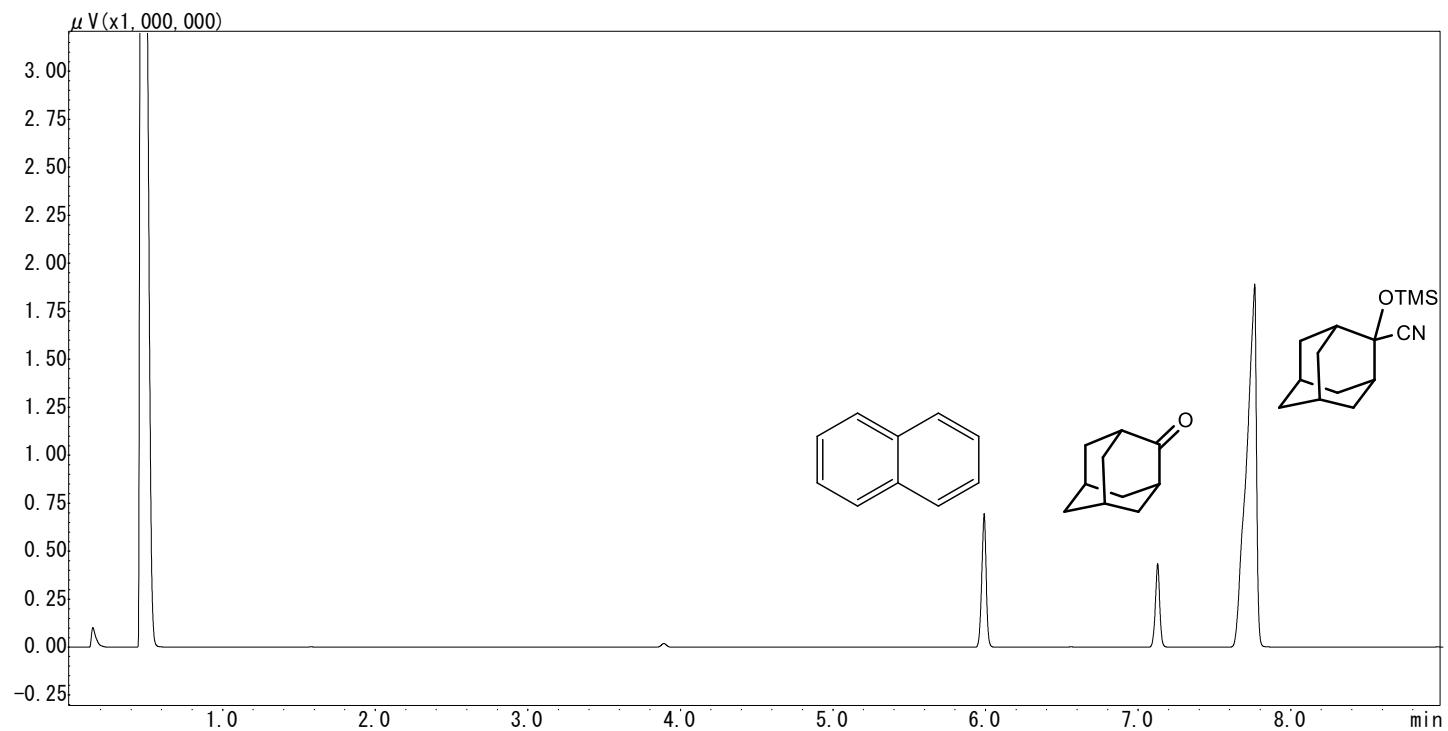

## MS spectrum

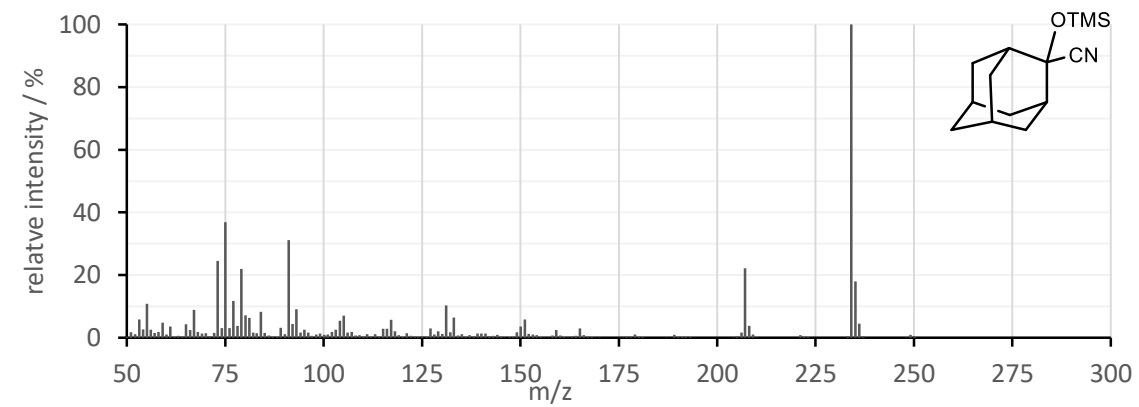

# GC chart

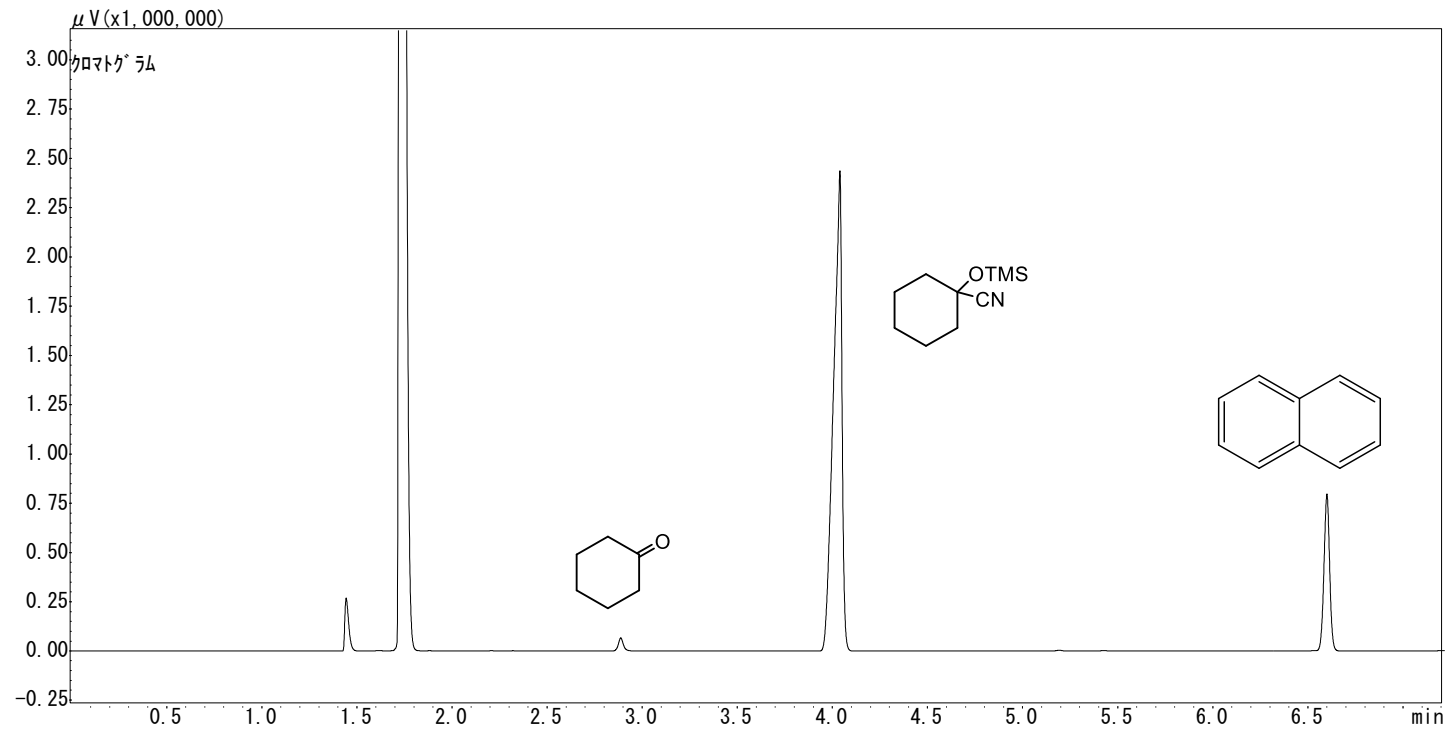

# MS spectrum

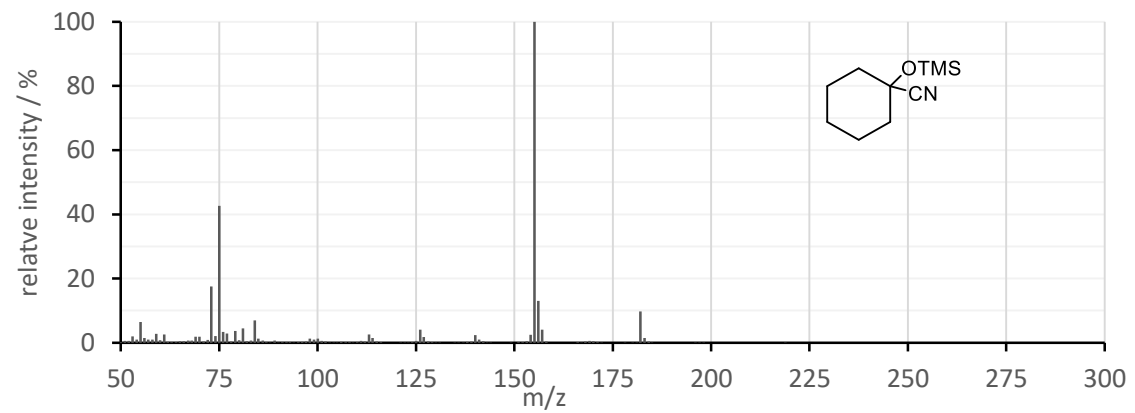

# GC chart

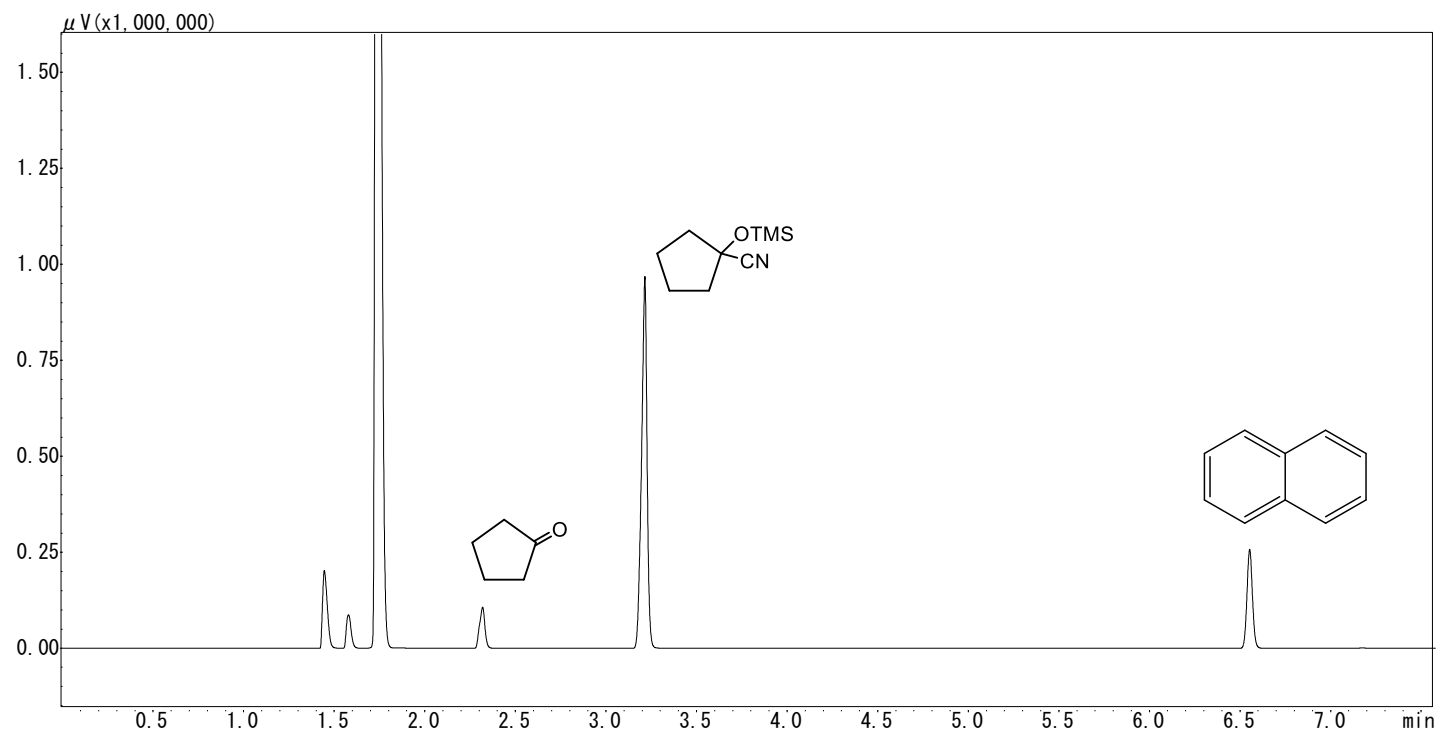

# MS spectrum

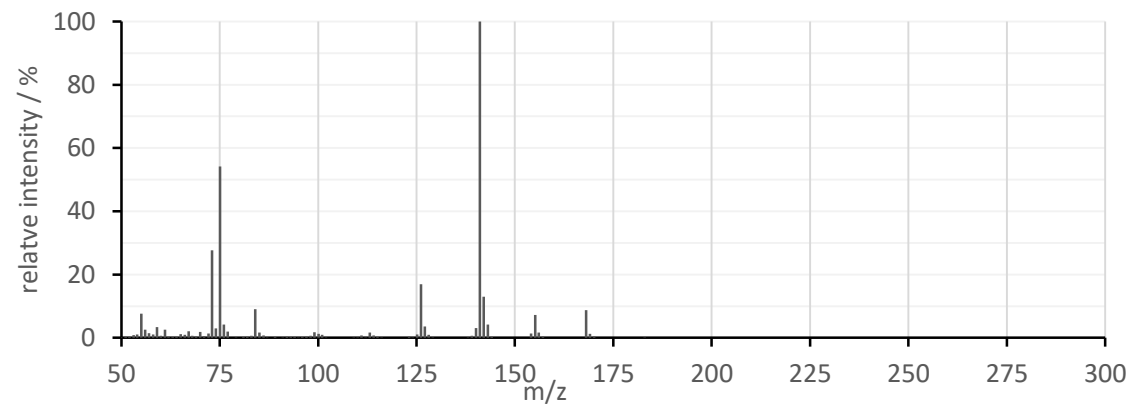

# GC chart

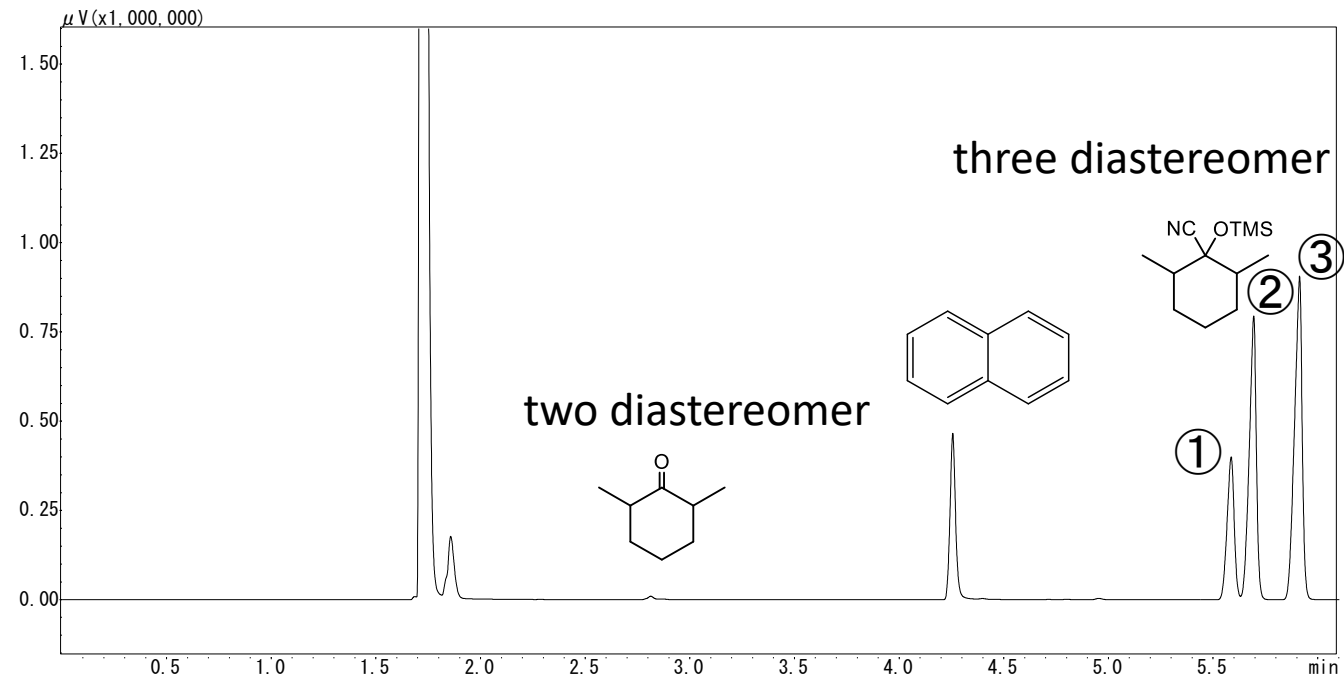

# MS spectrum

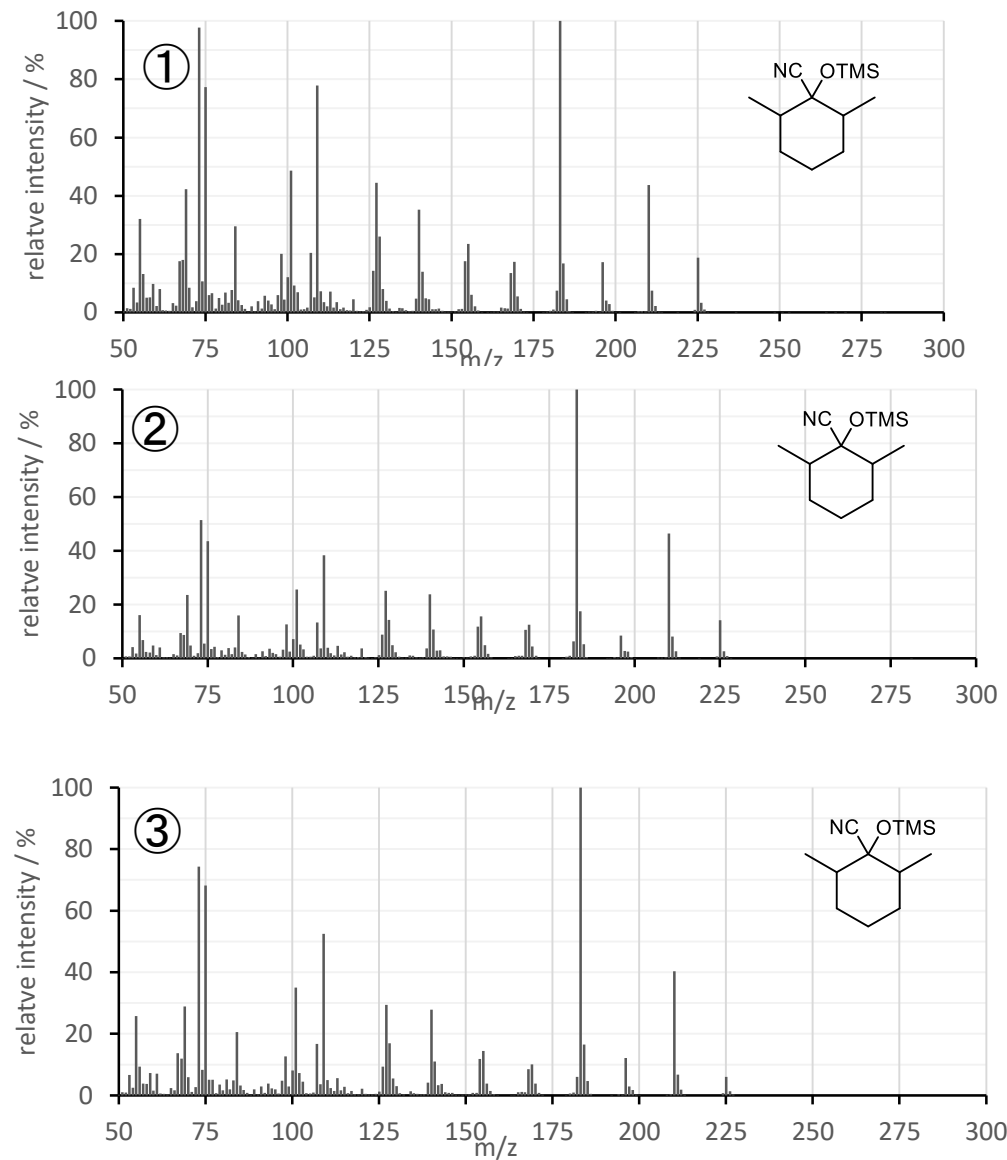

# GC chart

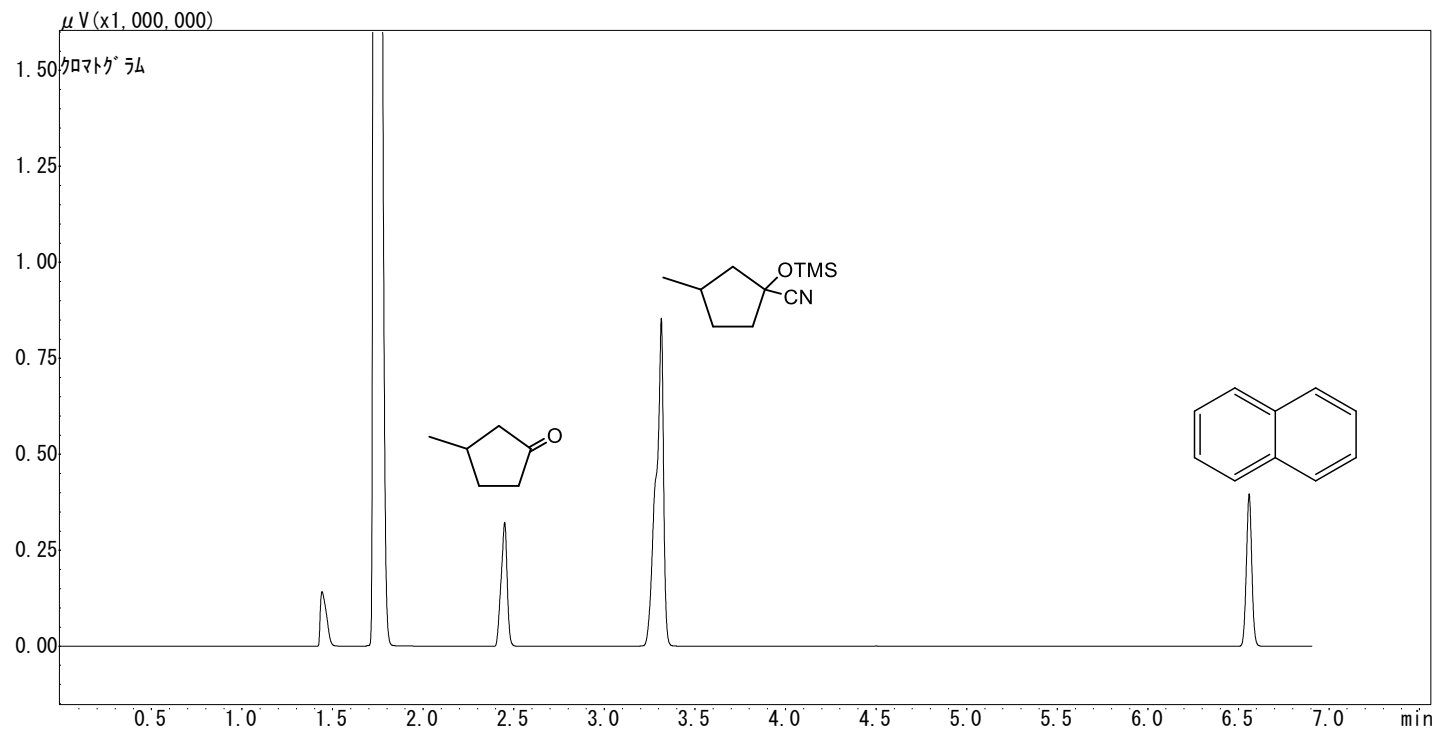

# MS spectrum

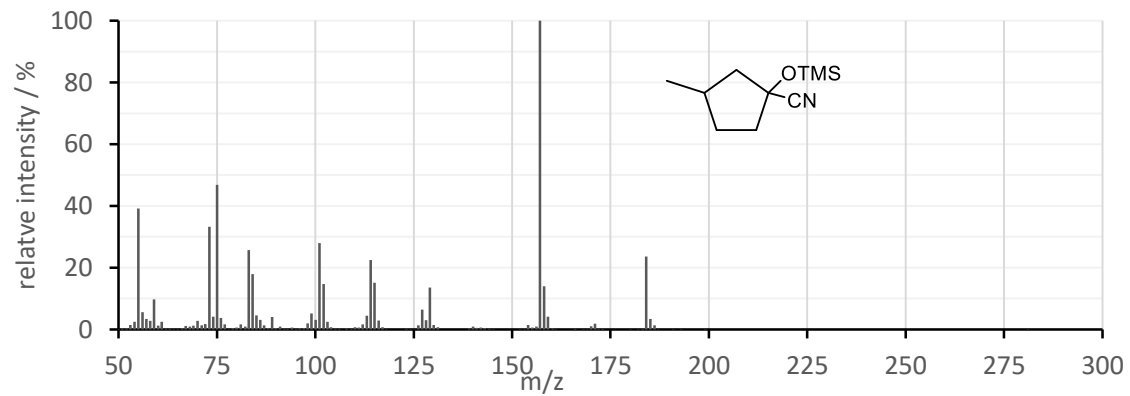

# GC chart

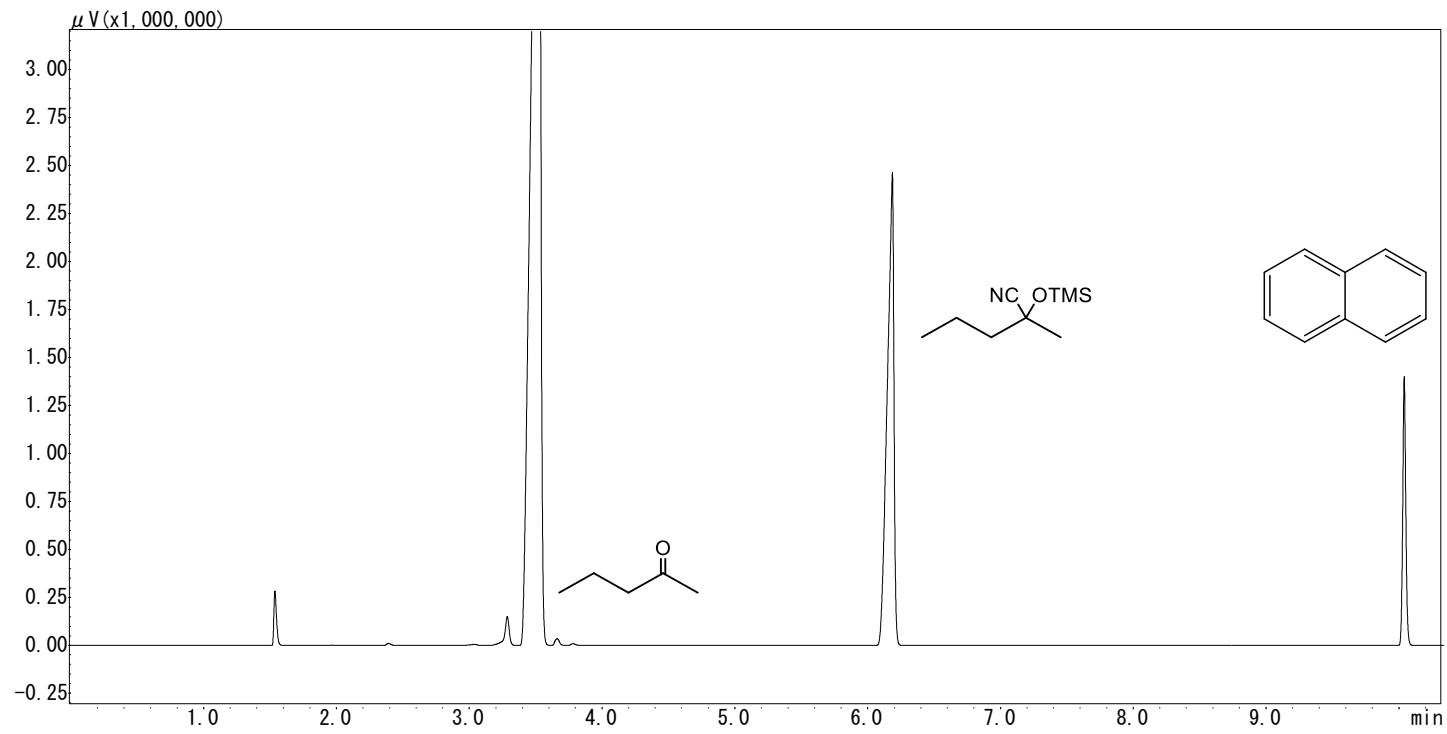

# MS spectrum

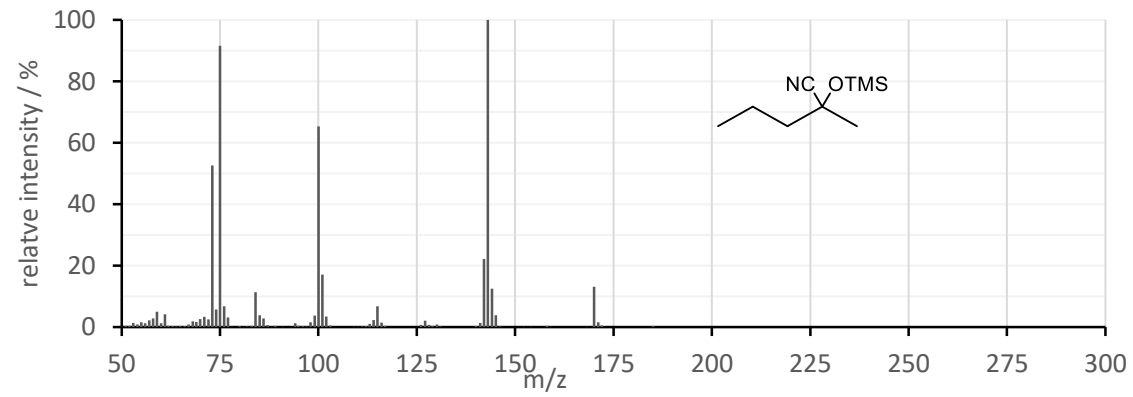

# GC chart

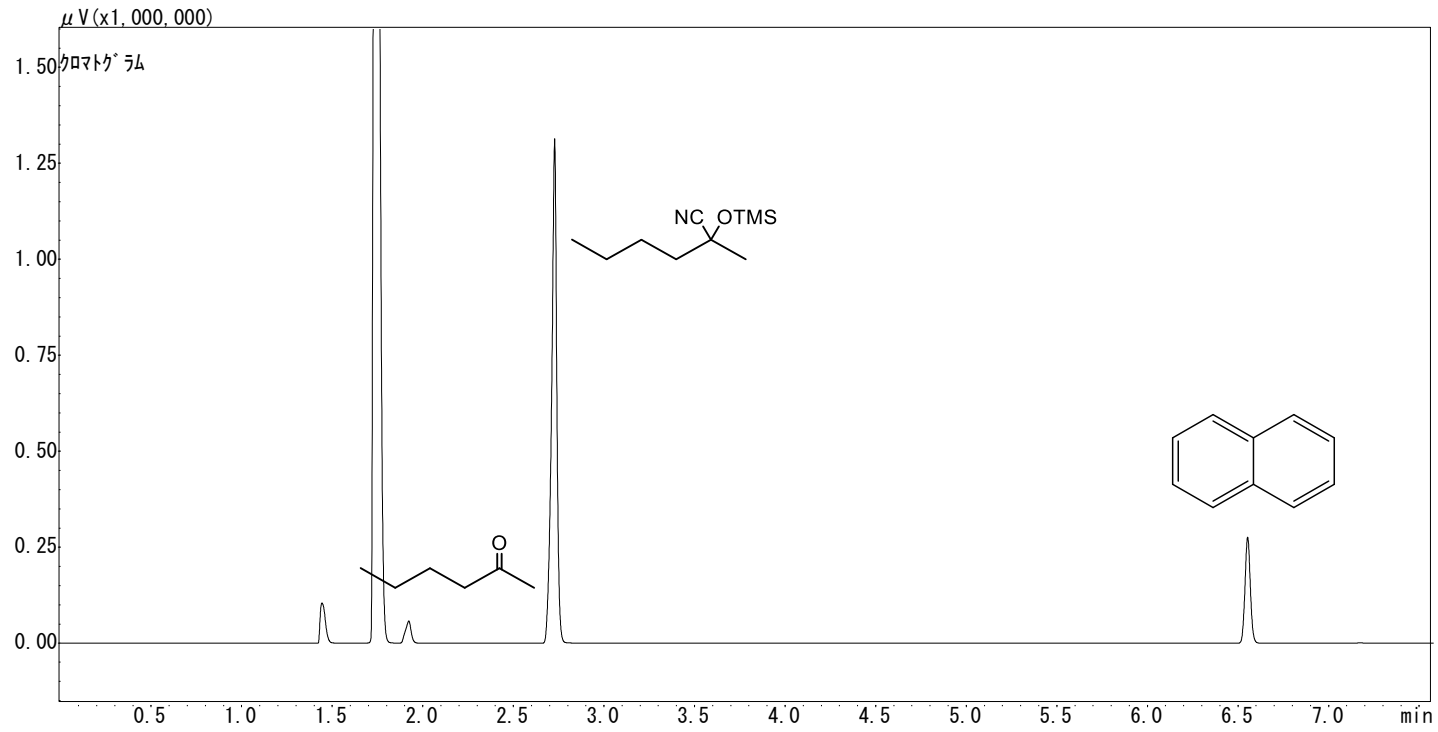

# MS spectrum

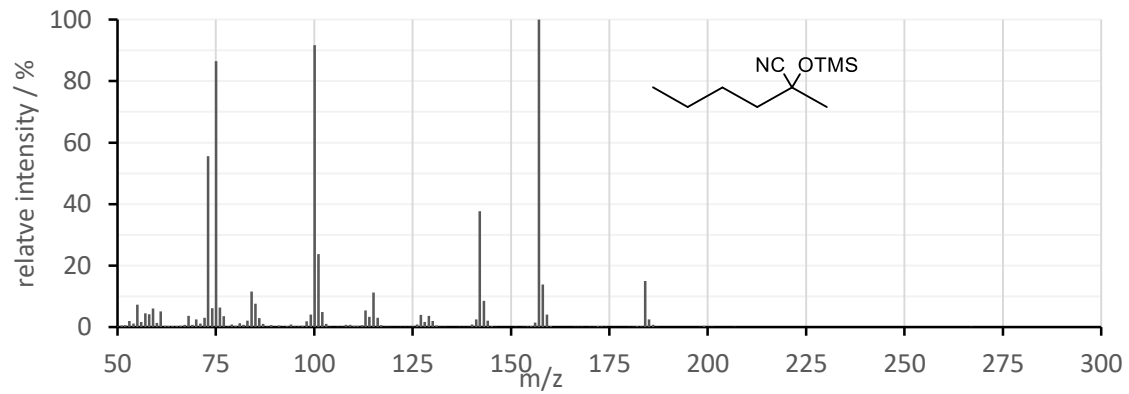

# GC chart

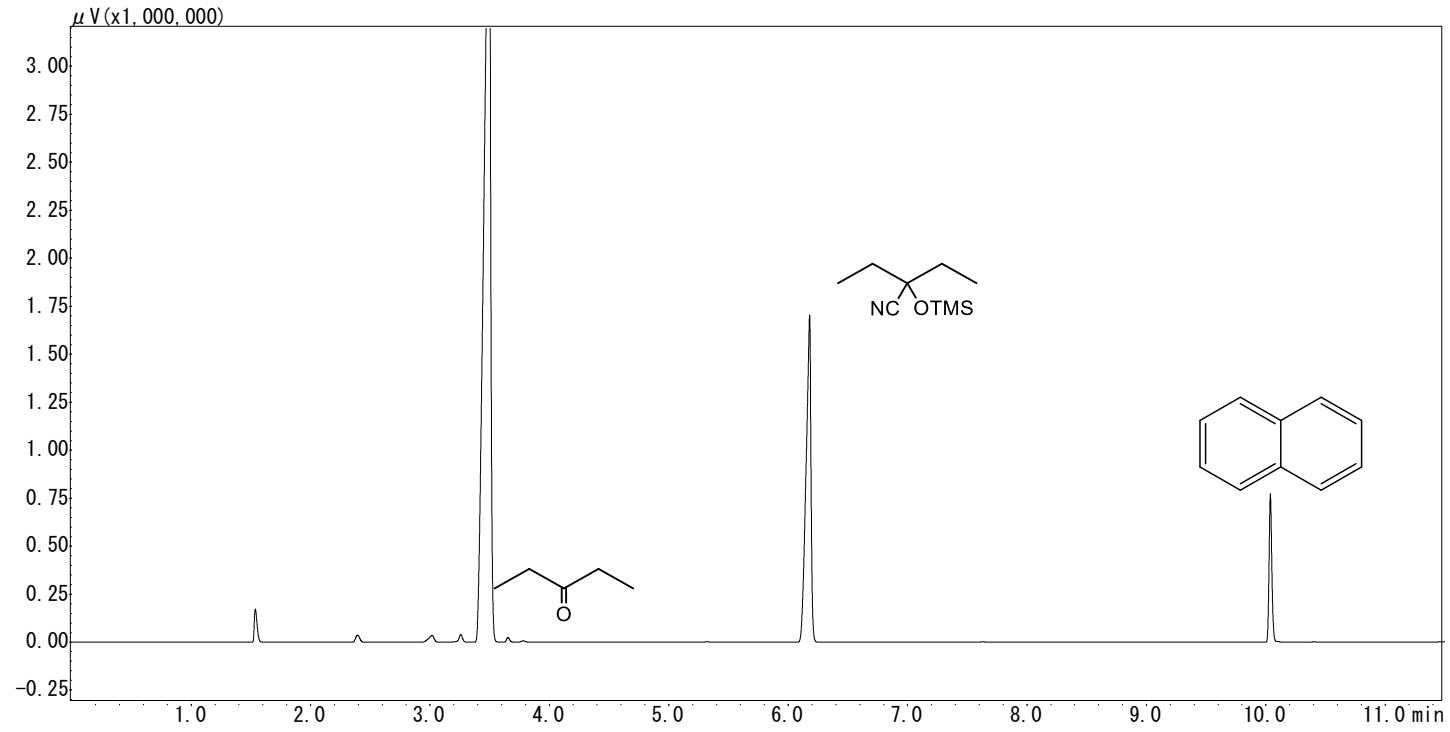

# MS spectrum

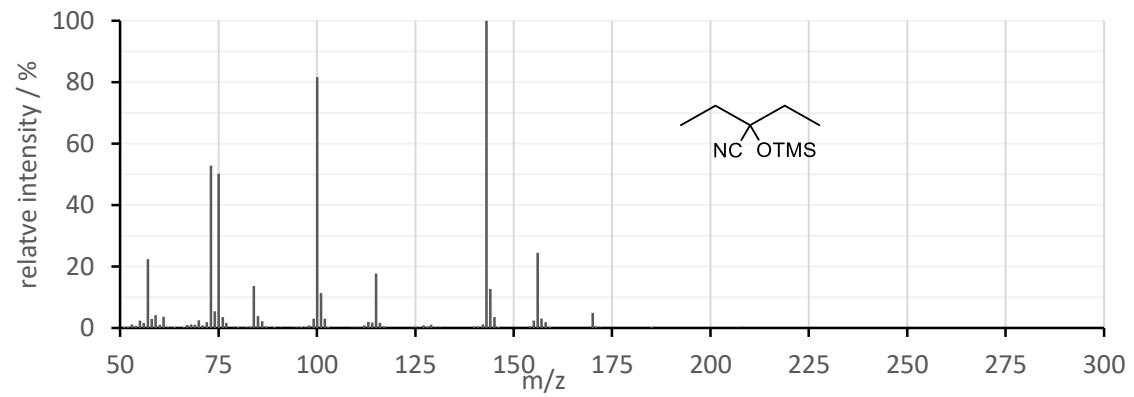



# GC chart

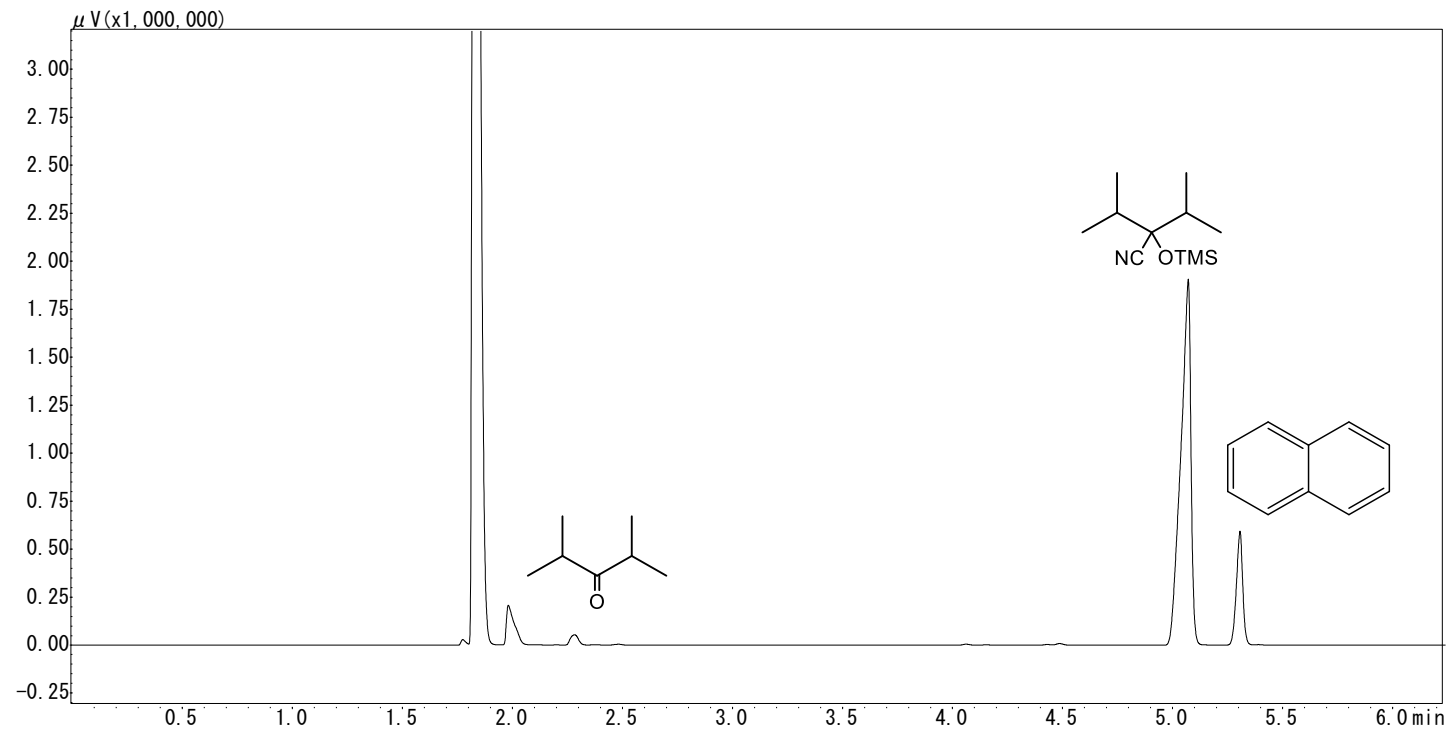

# MS spectrum

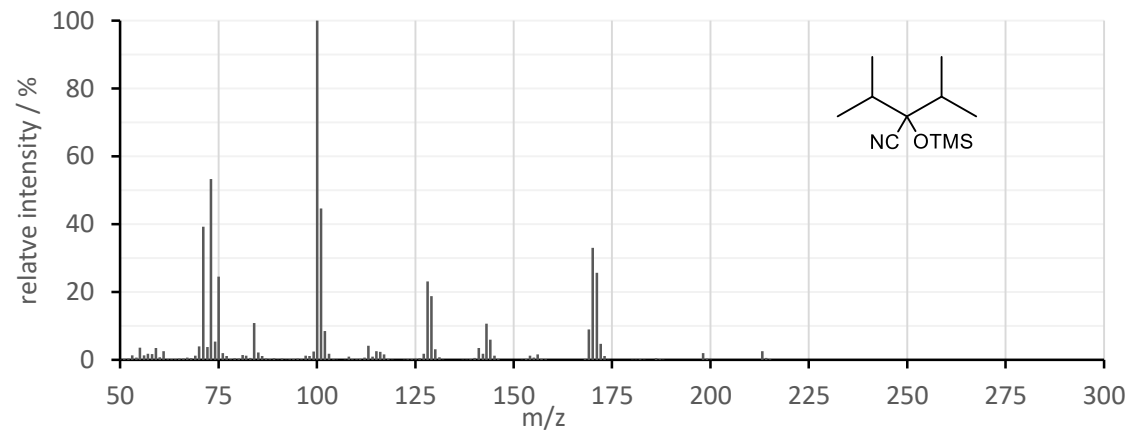

# GC chart

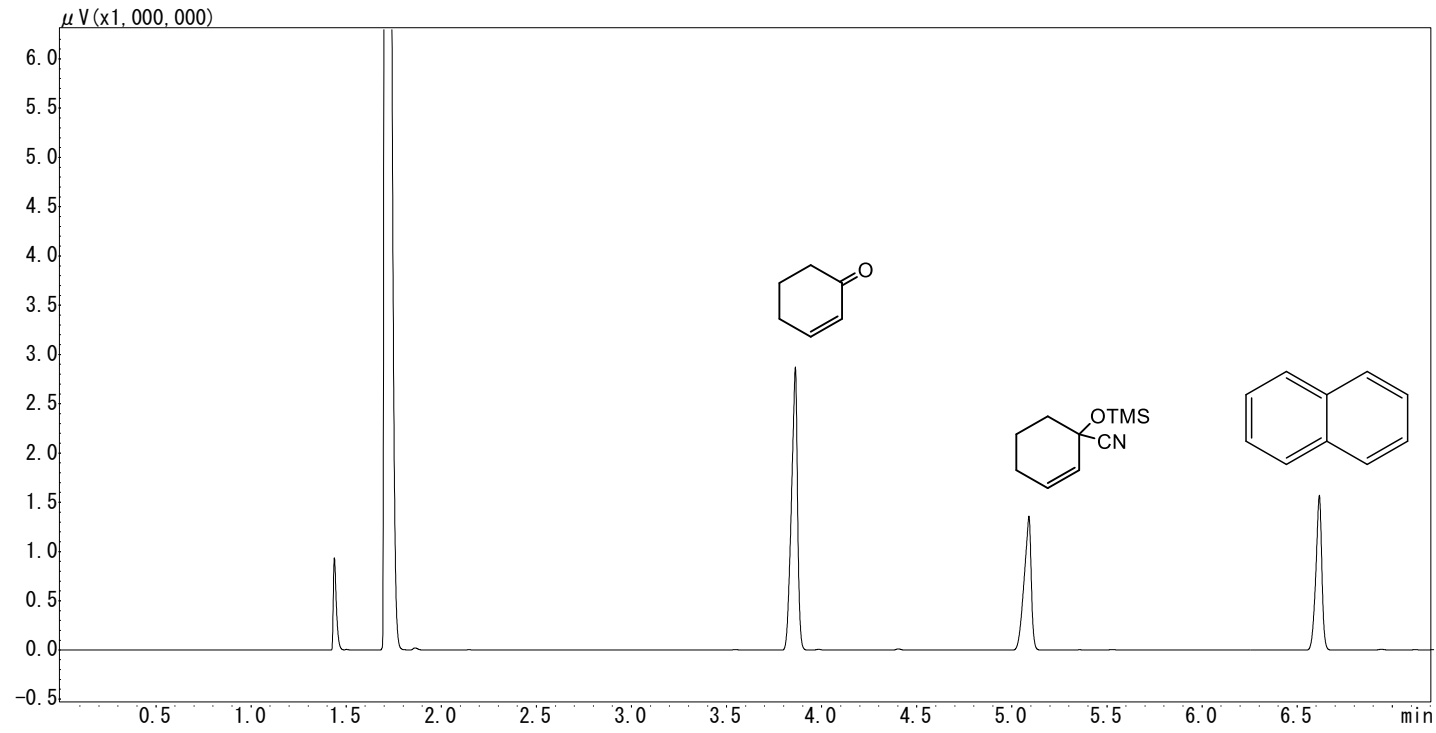

# MS spectrum

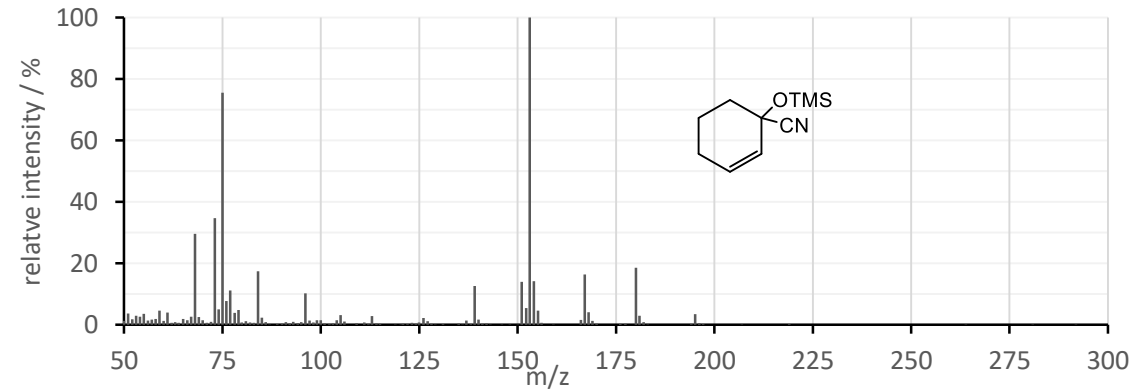

# GC chart

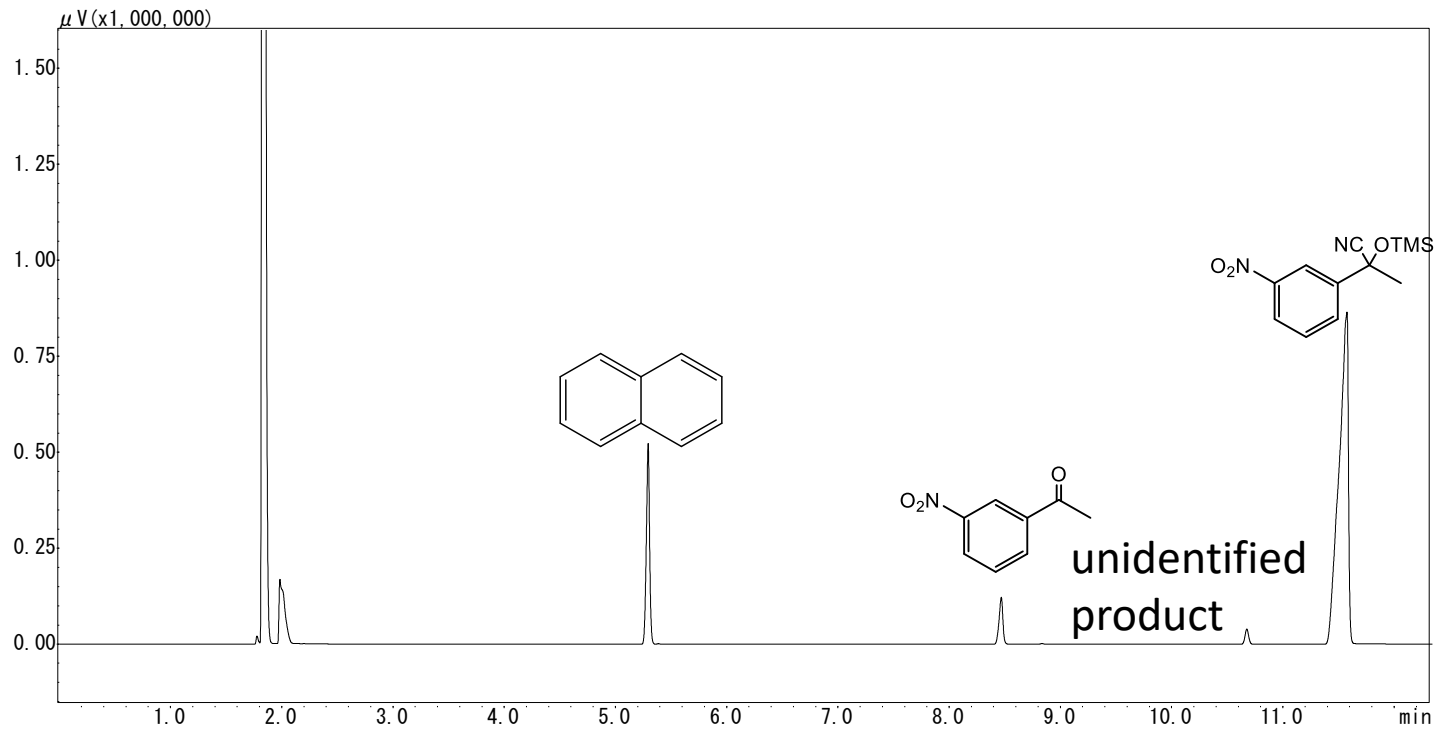

# MS spectrum

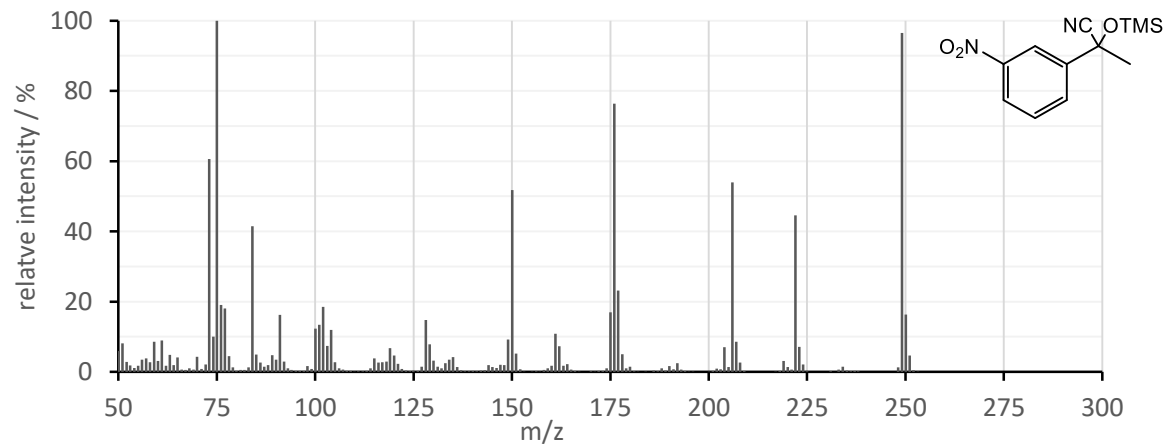

# GC chart

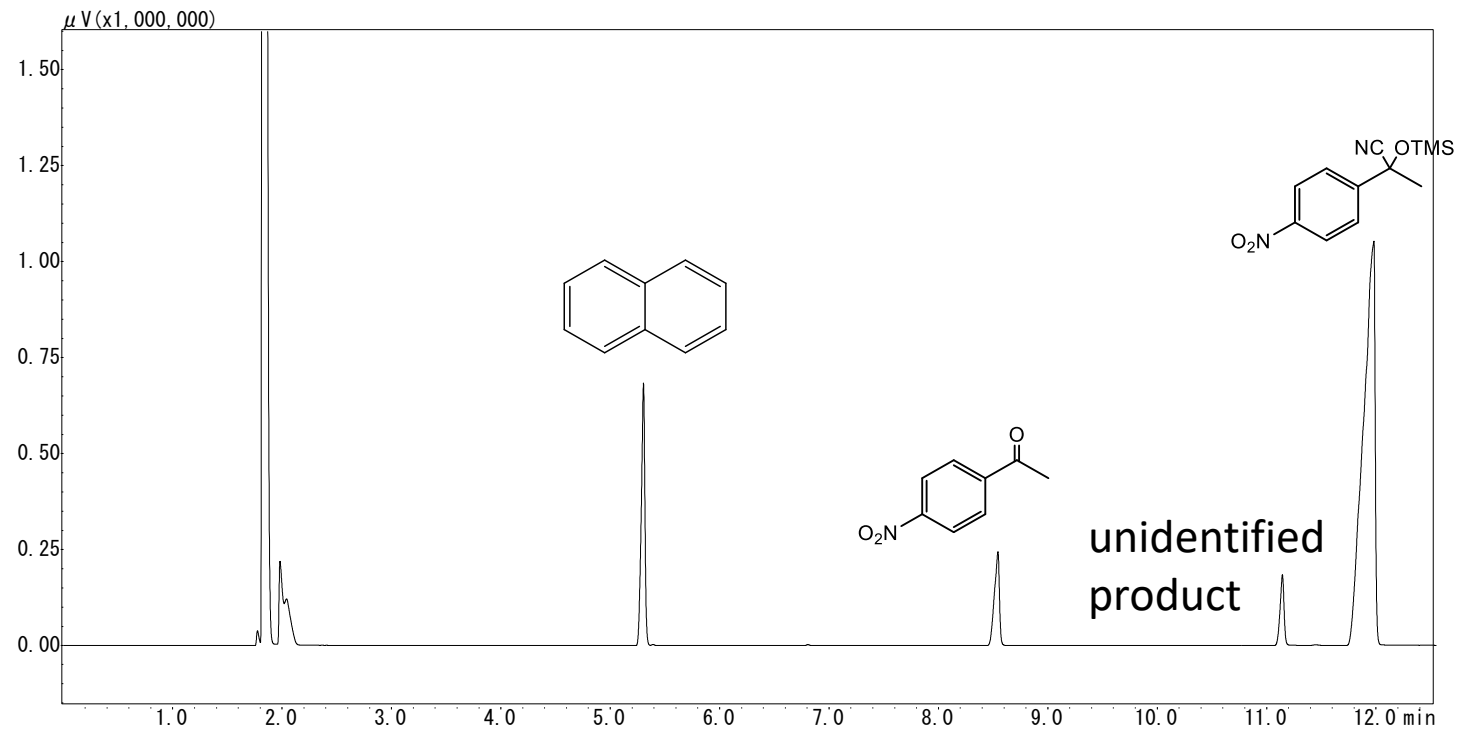

# MS spectrum

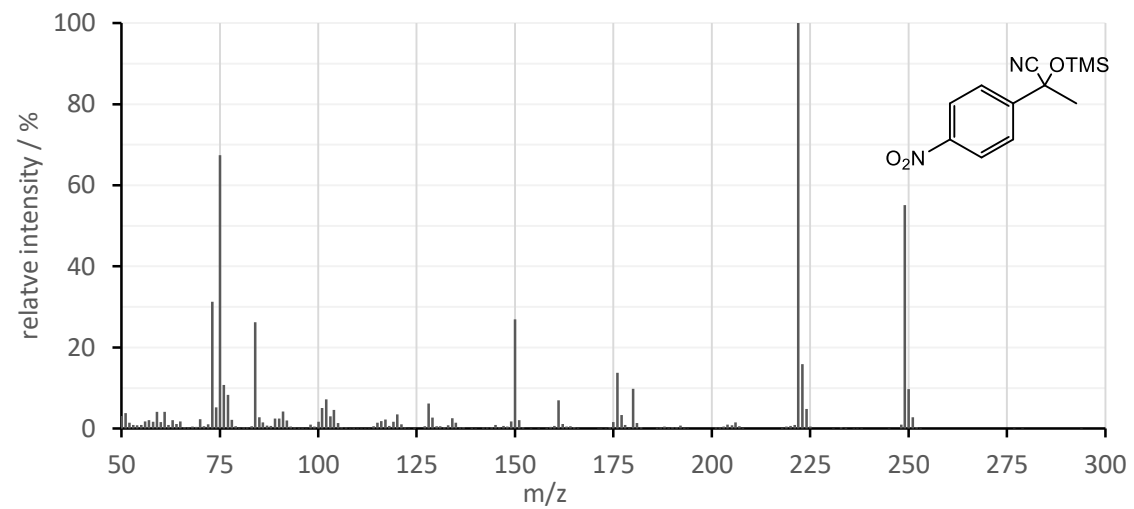

# GC chart

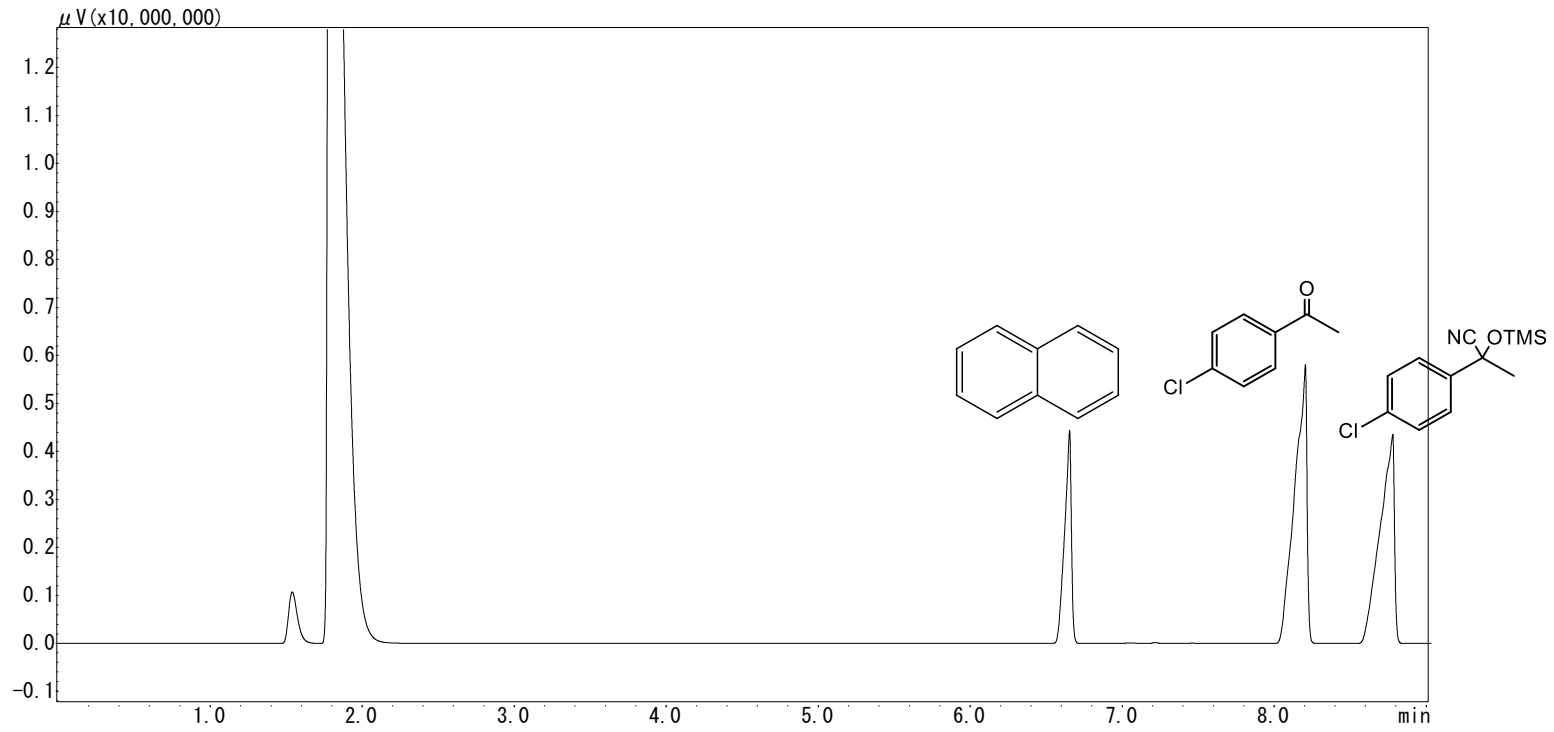

# MS spectrum

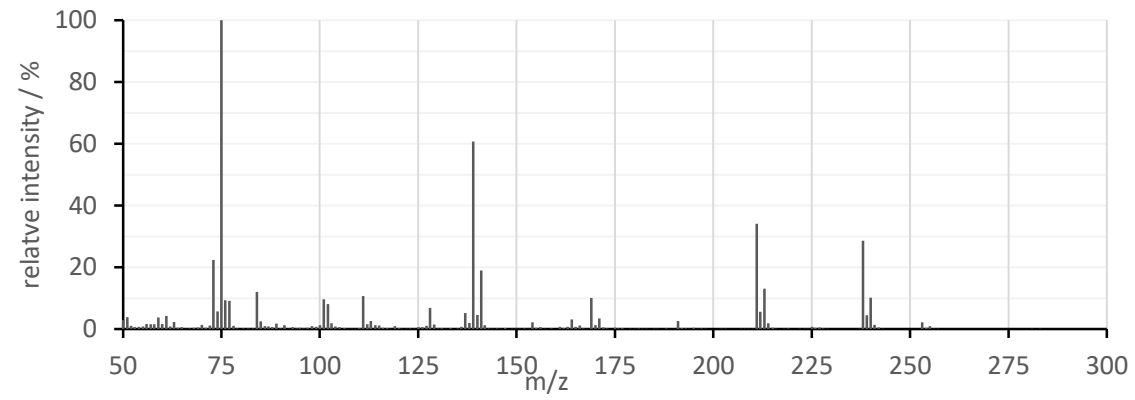

# GC chart

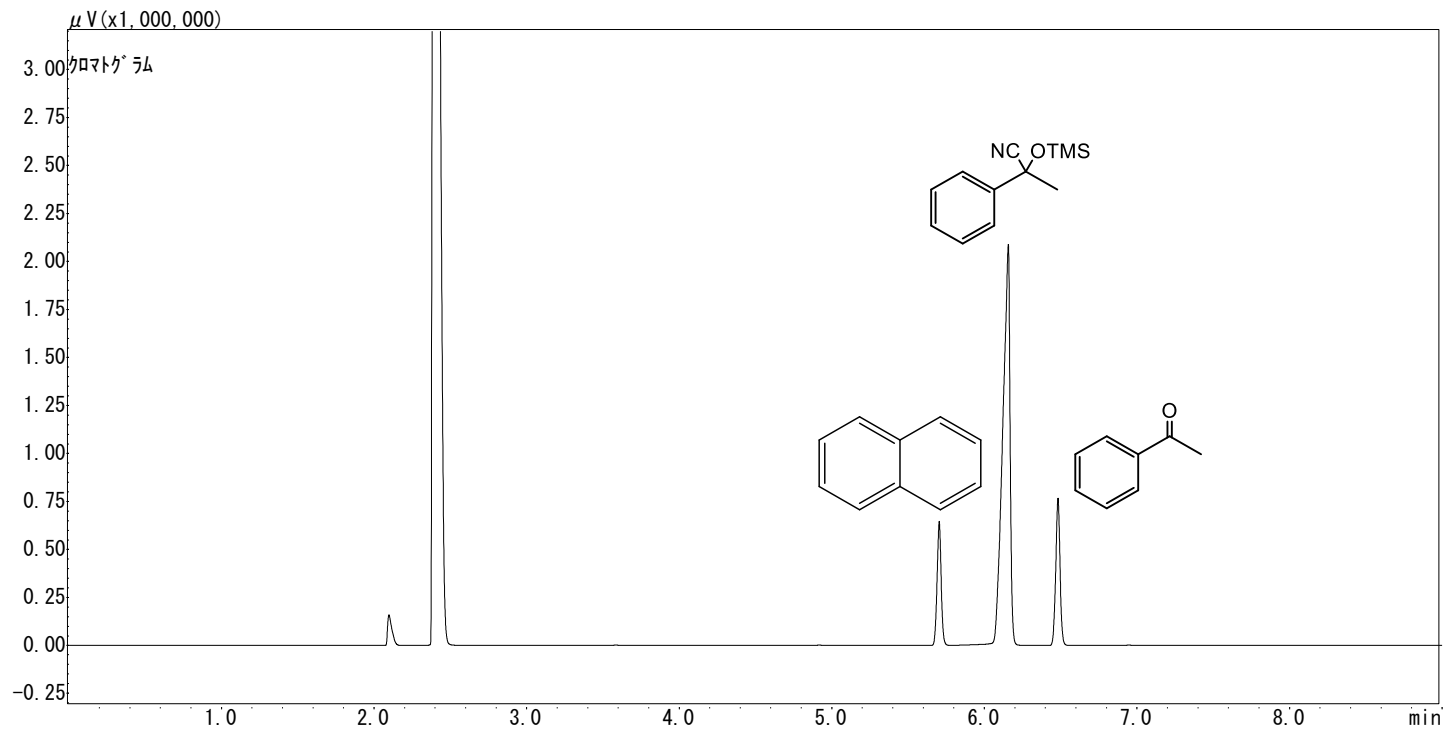

# MS spectrum

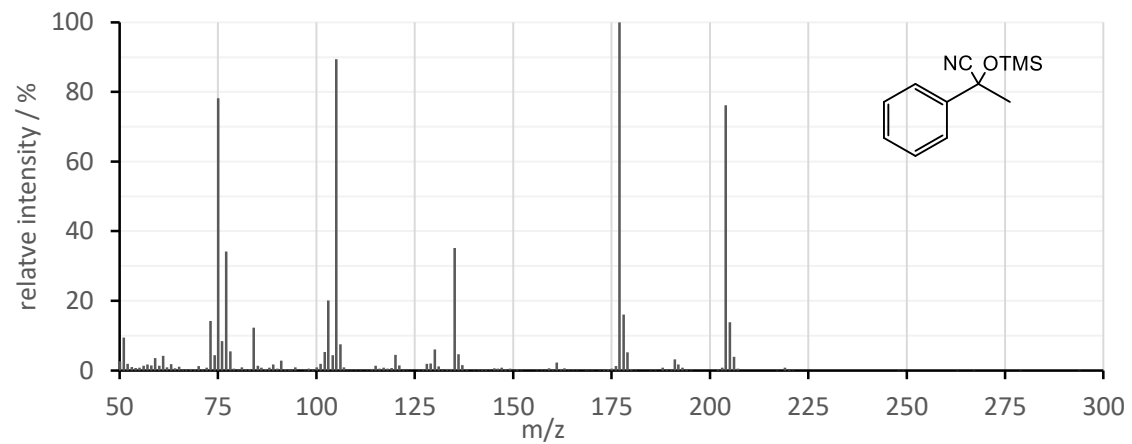

# GC chart

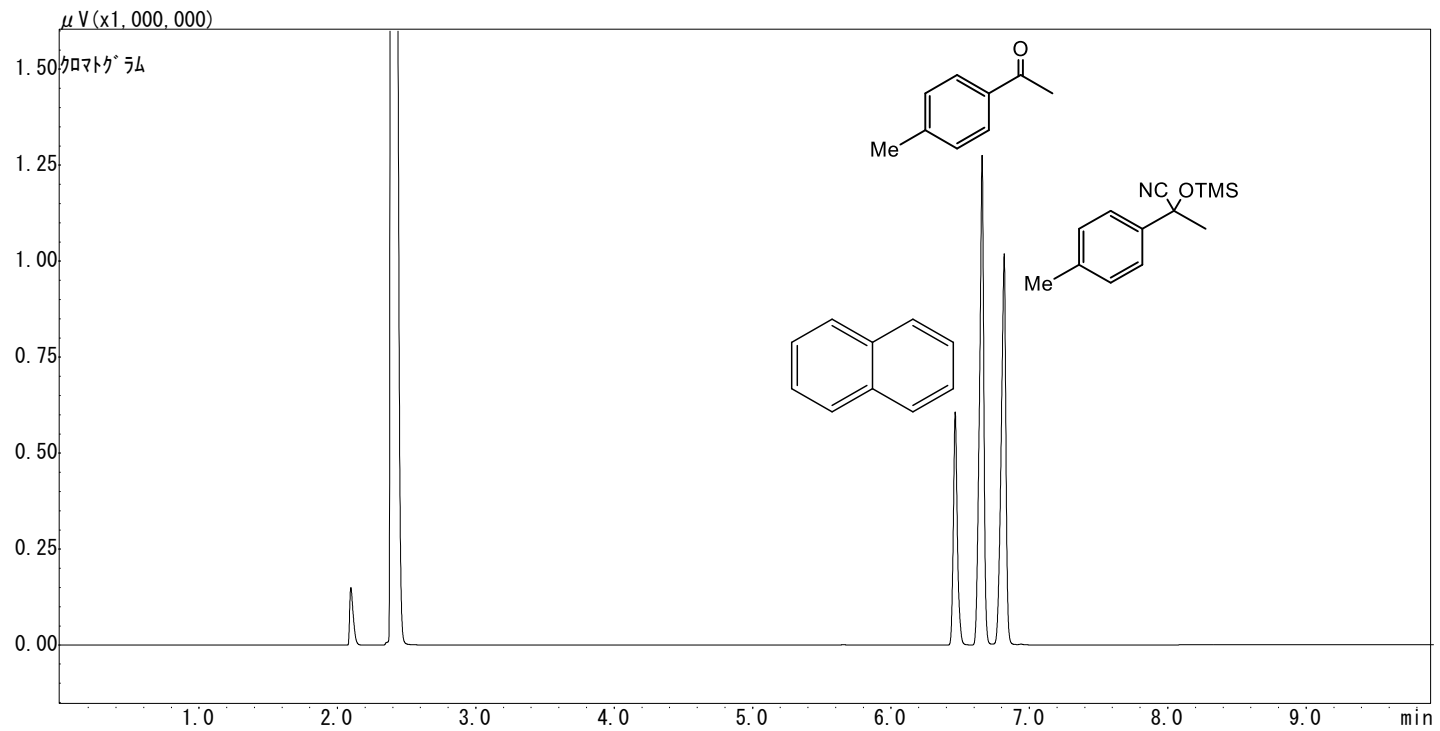

# MS spectrum

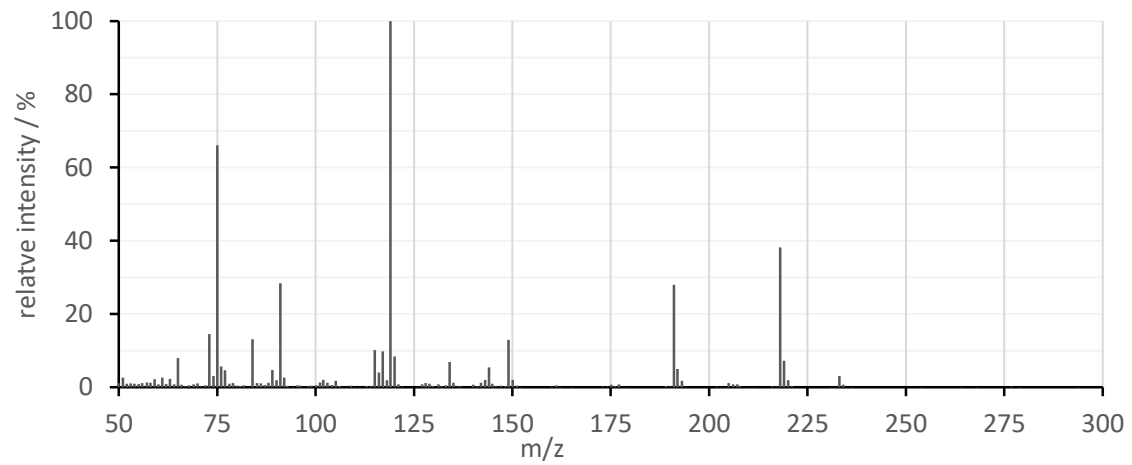

# GC chart

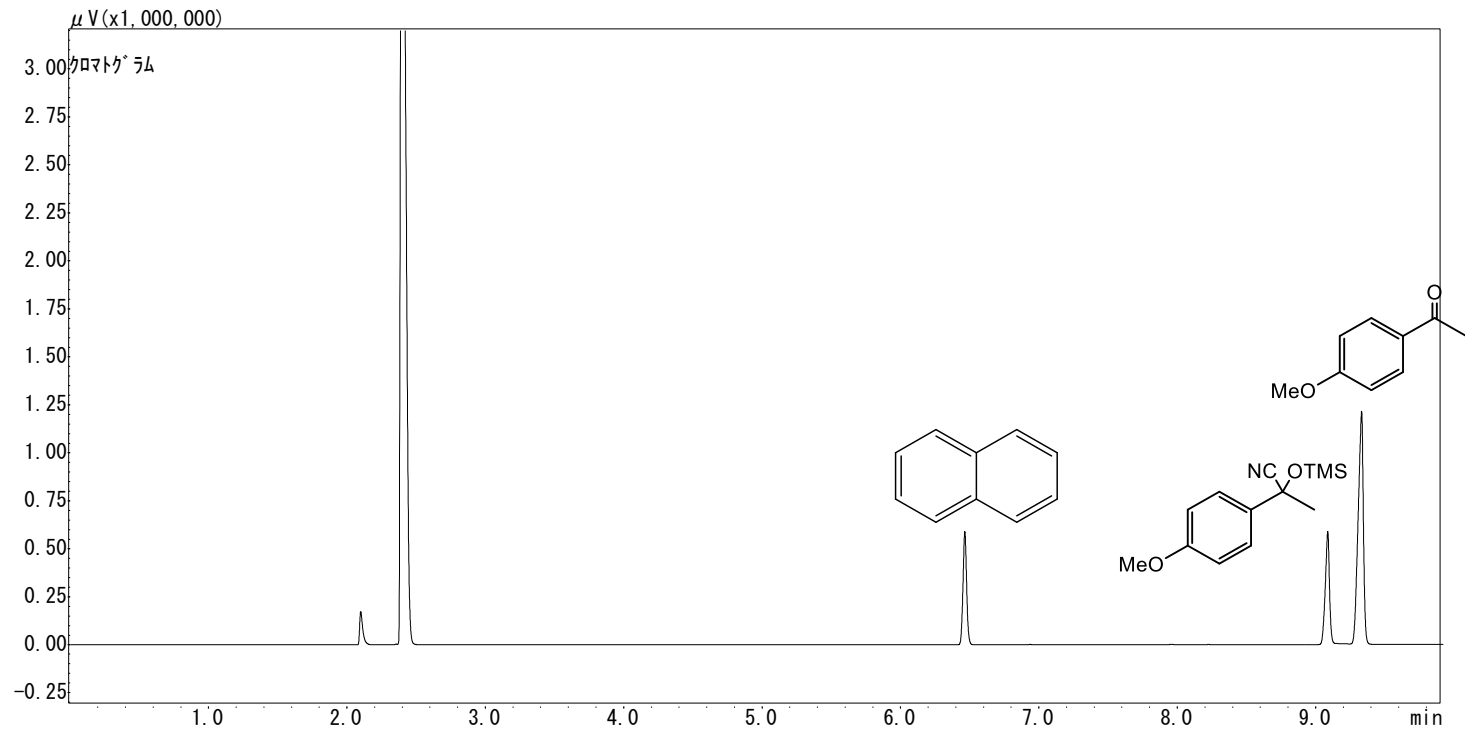

# MS spectrum

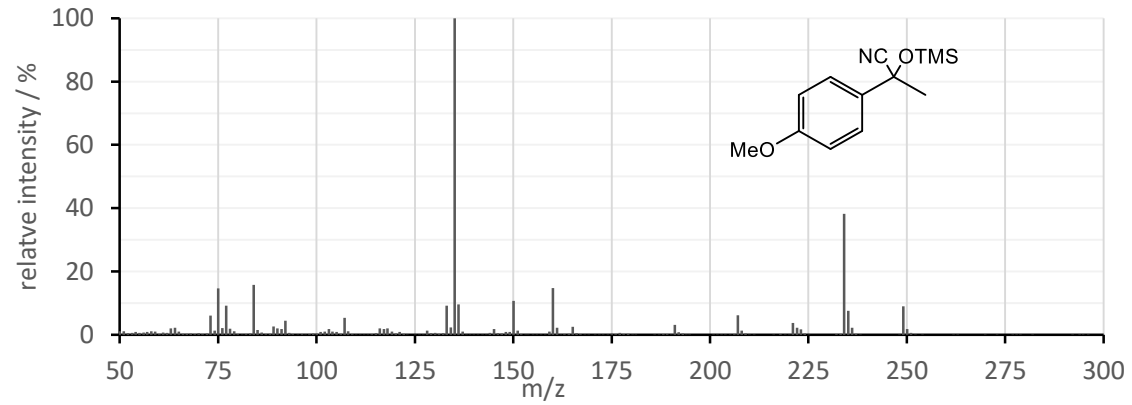



# GC chart

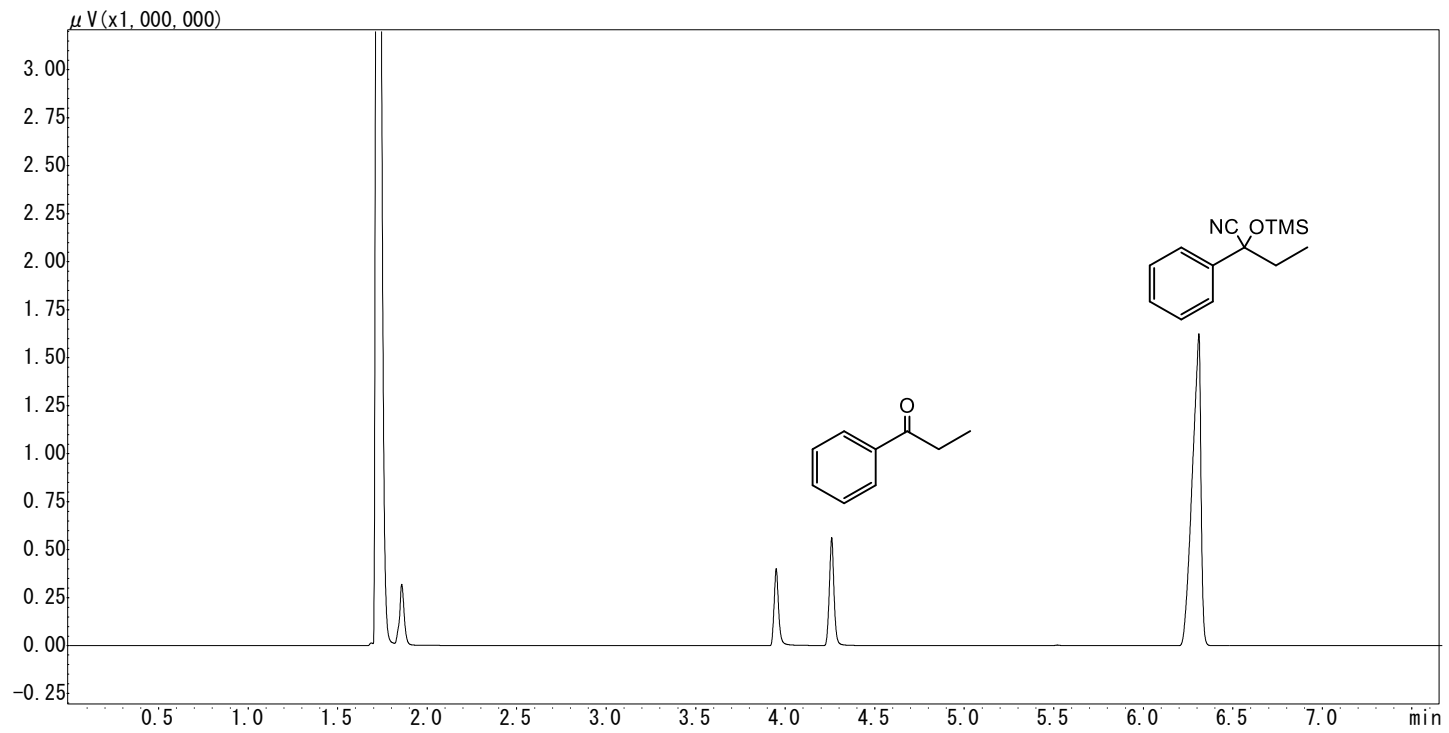

# MS spectrum

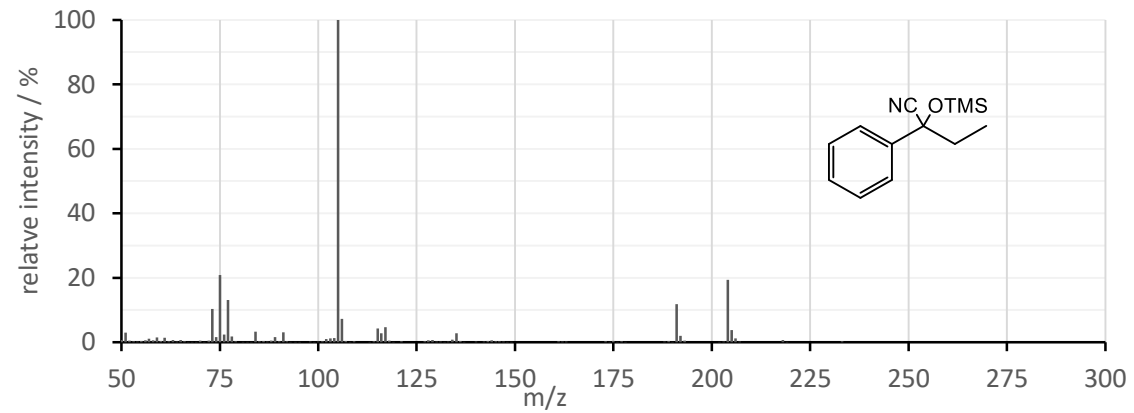

# GC chart

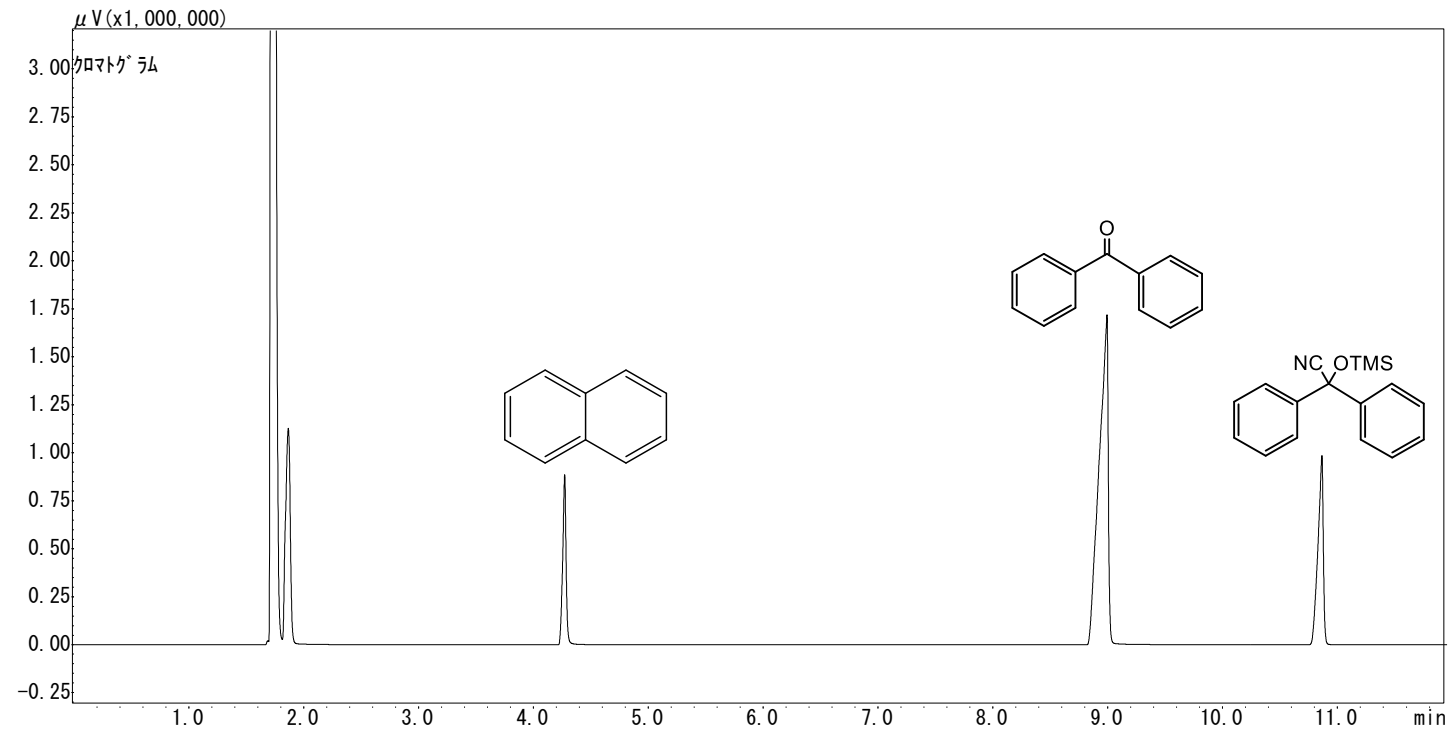

# MS spectrum

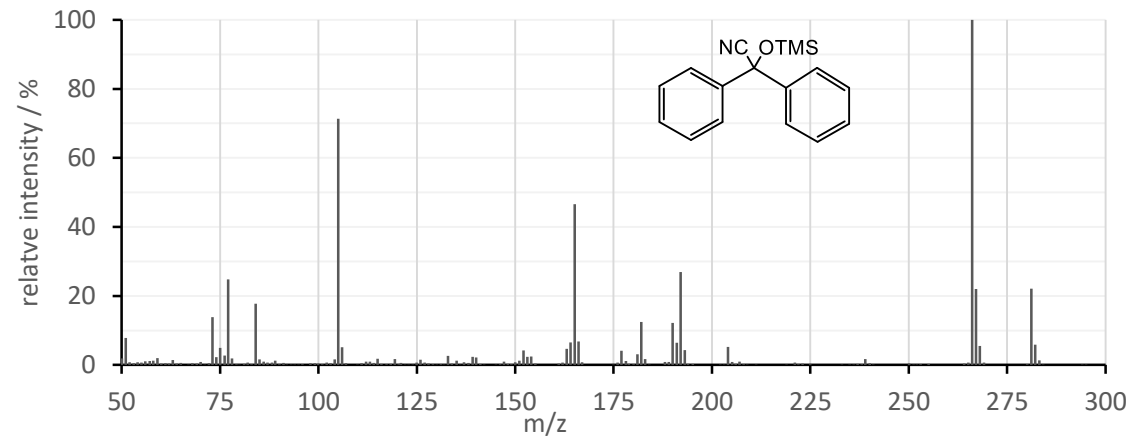

# GC chart

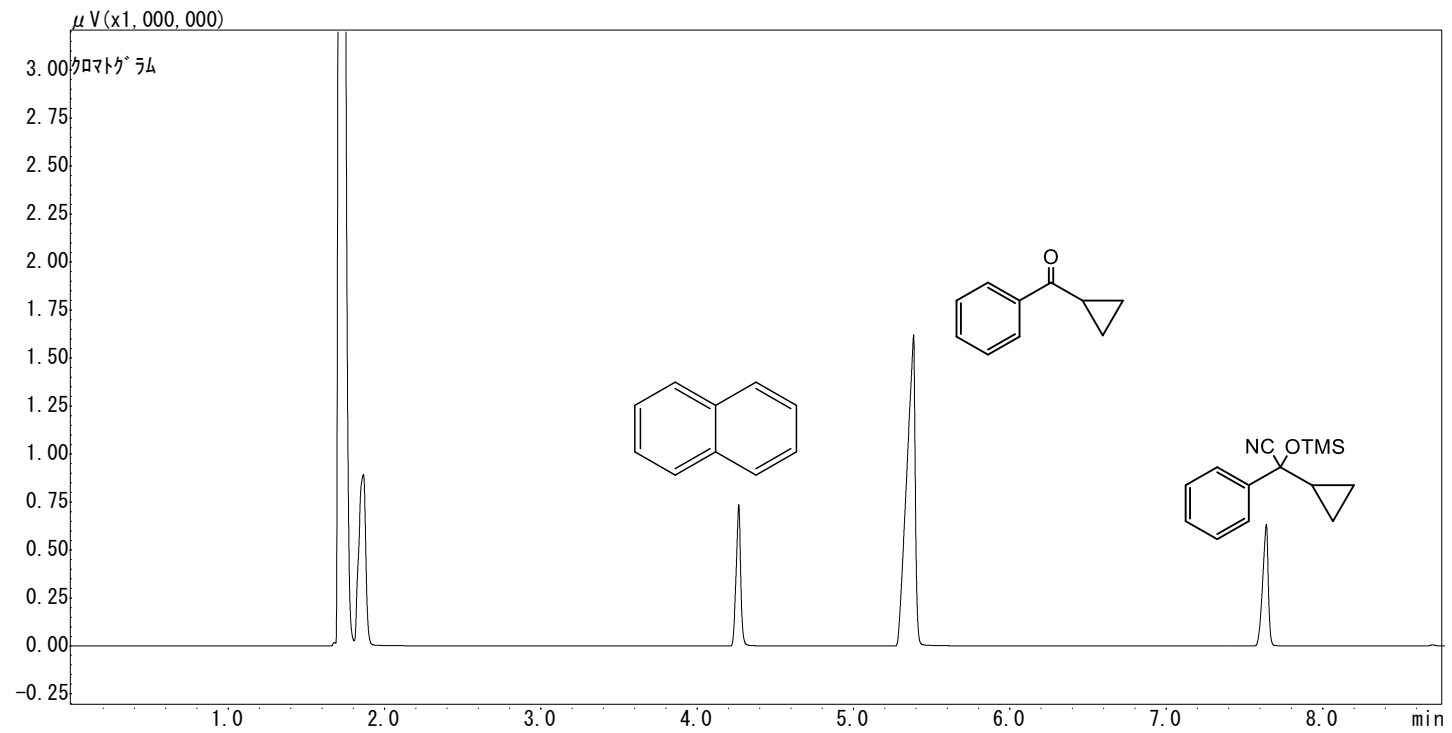

# MS spectrum

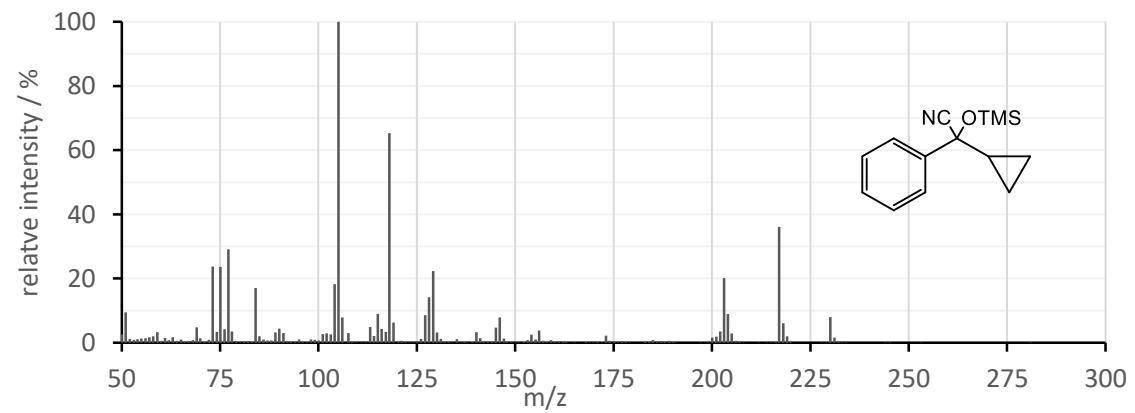

# GC chart

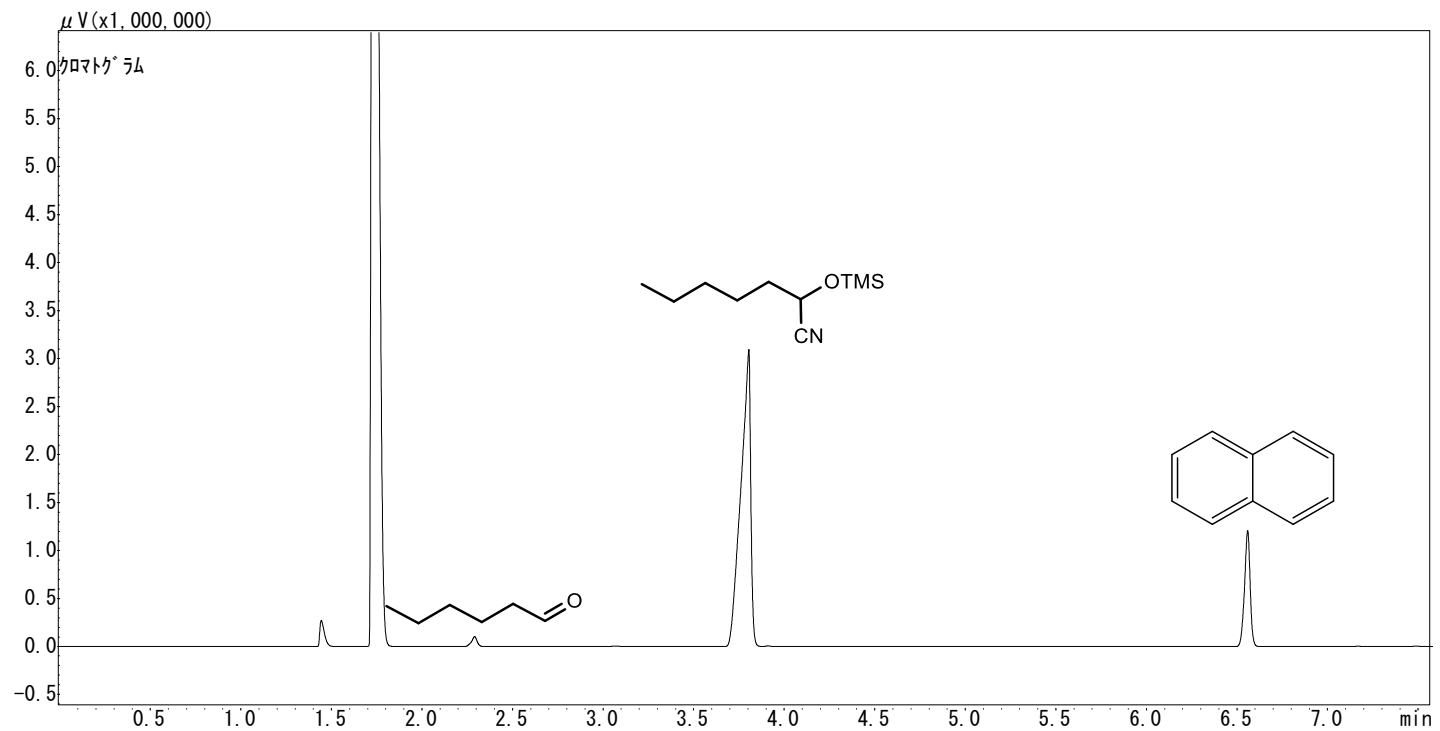

# MS spectrum

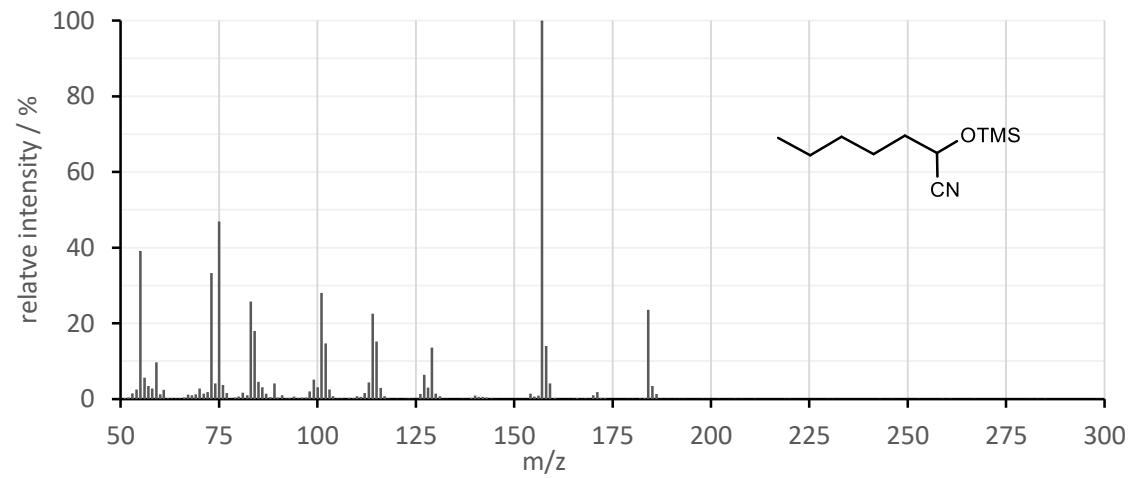

# GC chart

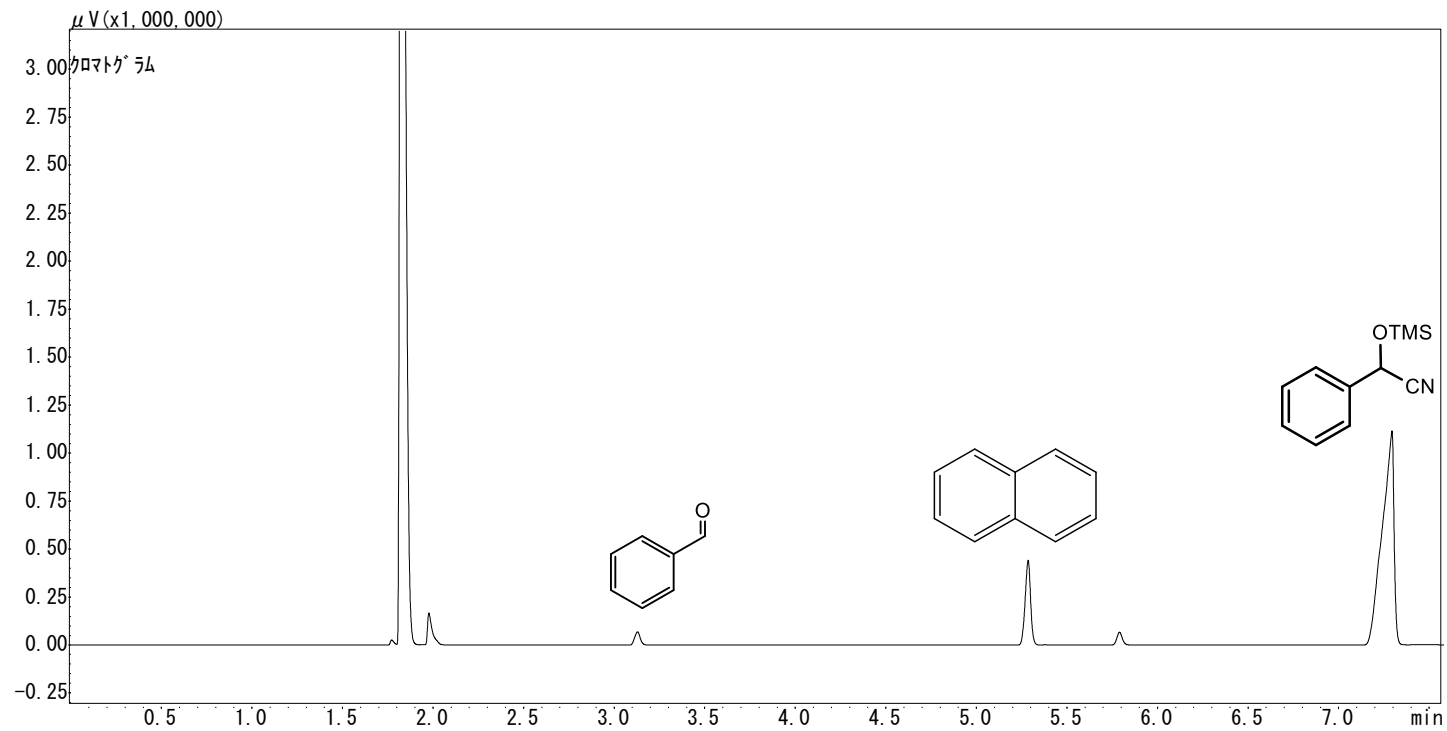

# MS spectrum

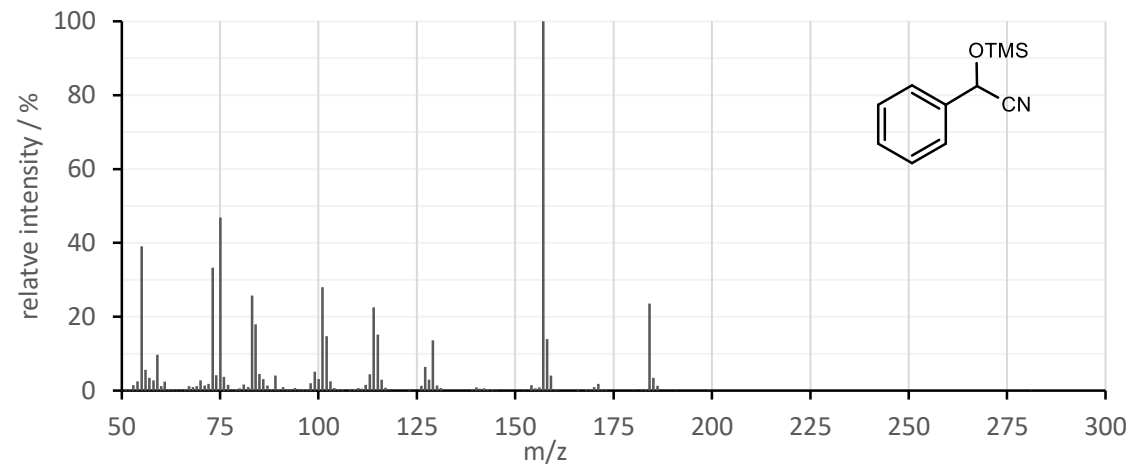

Supplement: d1ra05879g2.pdf [file d1ra05879g2.pdf]
