# Supplementary material for: Synthesis of cyanooxovanadate and cyanosilylation of ketones
Source: Royal Society of Chemistry journal article supplement (doi:10.1039/d1ra05879g), 2021-01-01
Supplement: d1ra05879g1.pdf [file d1ra05879g1.pdf]

*Supplementary information for*

## Synthesis of Cyanooxovanadate and Cyanosilylation of Ketones

Yuji Kikukawa,\* Hiroko Kawabata and Yoshihito Hayashi

Department of Chemistry, Graduate School of Natural Science and Technology, Kanazawa University, Kakuma, Kanazawa 920-1192 (Japan)

**Table S1.** Crystallographic data for  $(\text{Et}_4\text{N})_2[\text{VO}_2(\text{CN})_3]$

|                            |                                                                |
|----------------------------|----------------------------------------------------------------|
| formula                    | $\text{C}_{57}\text{H}_{120}\text{N}_{15}\text{O}_6\text{V}_3$ |
| fw                         | 1264.49                                                        |
| crystal system             | monoclinic                                                     |
| space group                | $P2_1/c$ (#14)                                                 |
| $a$ (Å)                    | 8.2400(2)                                                      |
| $b$ (Å)                    | 34.3199(8)                                                     |
| $c$ (Å)                    | 12.7556(3)                                                     |
| $\beta$ (deg)              | 93.1970(10)                                                    |
| $V$ (Å <sup>3</sup> )      | 3601.62(15)                                                    |
| $Z$                        | 2                                                              |
| $\mu$ (mm <sup>-1</sup> )  | 3.616                                                          |
| $R_1$ ( $I > 2\sigma(I)$ ) | 0.0711                                                         |
| $wR_2$                     | 0.1940                                                         |

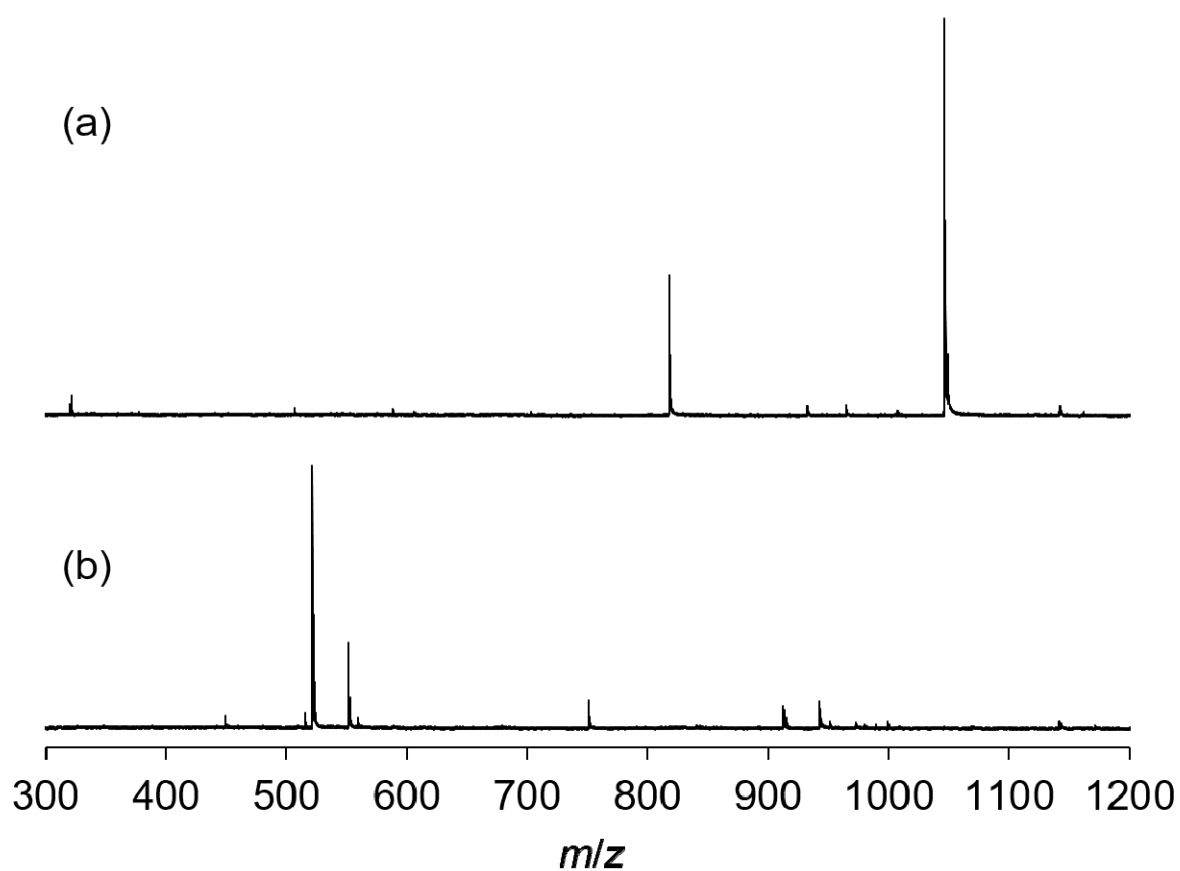

**Figure S1.** Positive mode of CSI-MS spectra of acetonitrile solution of tetraethylammonium salt of methavanadate (a) without addition of TMSCN and (b) in the presence of TMSCN. The main signal sets in (a) at  $m/z$  817 and 1047 are assignable to  $\{(\text{Et}_4\text{N})_4[\text{V}_3\text{O}_9]\}^+$  and  $\{(\text{Et}_4\text{N})_5[\text{V}_4\text{O}_{12}]\}^+$ , respectively. The main signal sets in (b) at  $m/z$  521 and 551 are assignable to  $\{(\text{Et}_4\text{N})_2\text{TMS}_2\text{VO}_4\}^+$  and  $\{(\text{Et}_4\text{N})_3\text{VO}_2(\text{CN})_3\}^+$ , respectively.

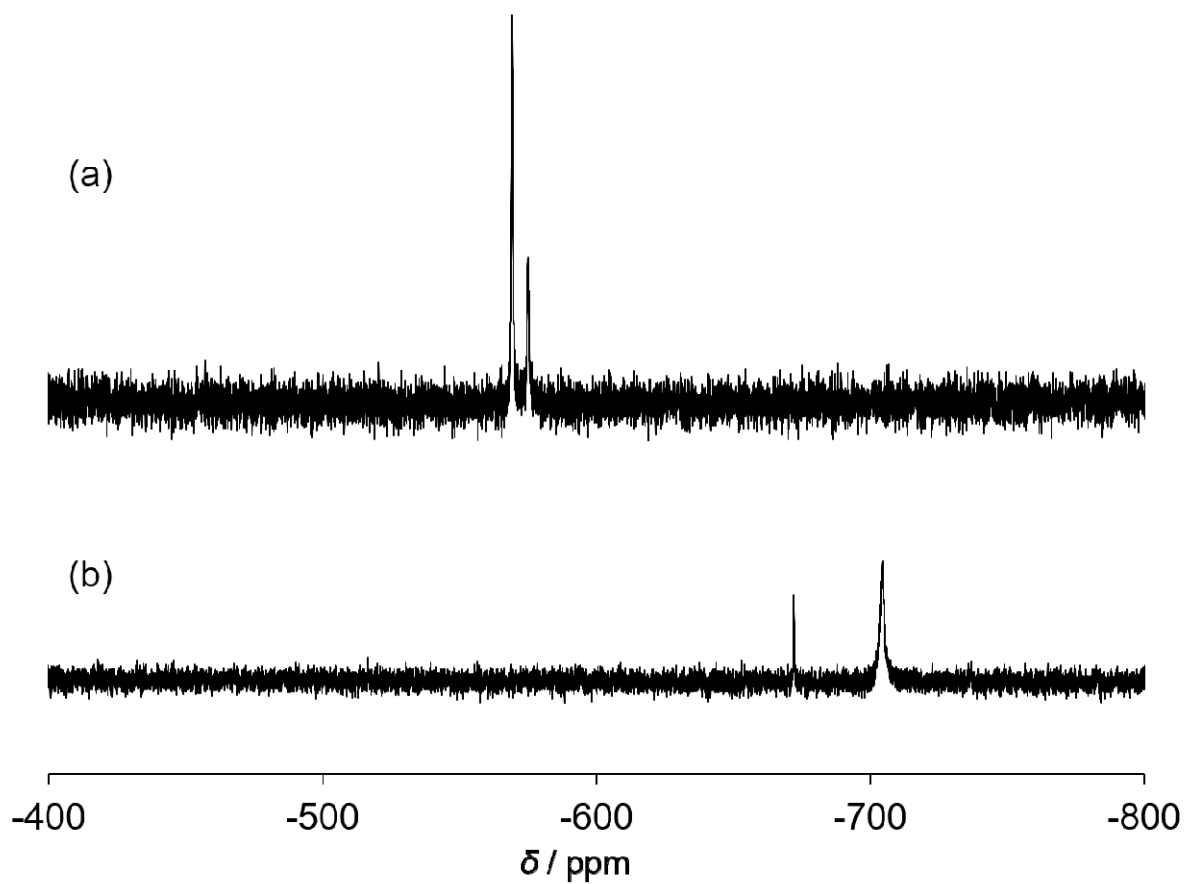

**Figure S2.**  $^{51}\text{V}$  NMR spectrum of tetraethylammonium salt of methavanadate (a) without addition of TMSCN and (b) in the presence of TMSCN. Vanadium concentration is 2 mM.

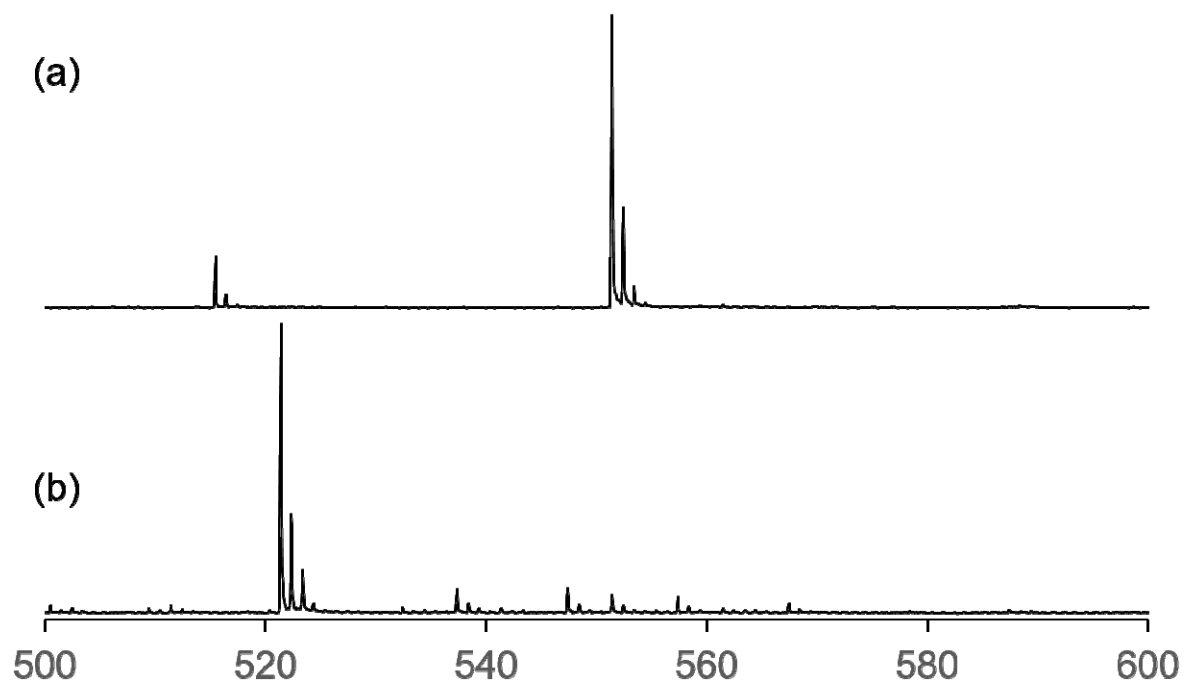

**Figure S3.** Positive mode of CSI-MS spectra of the reaction solution of cyanosilylation of 2-adamantanone with  $(\text{Et}_4\text{N})_2[\text{VO}_2(\text{CN})_3]$  (a) before and (b) during the reaction. The main signal sets at  $m/z$  551 in (a) and  $m/z$  521 in (b) are assignable to  $\{(\text{Et}_4\text{N})_3\text{VO}_2(\text{CN})_3\}^+$  and  $\{(\text{Et}_4\text{N})_2\text{TMS}_2\text{VO}_4\}^+$ , respectively.

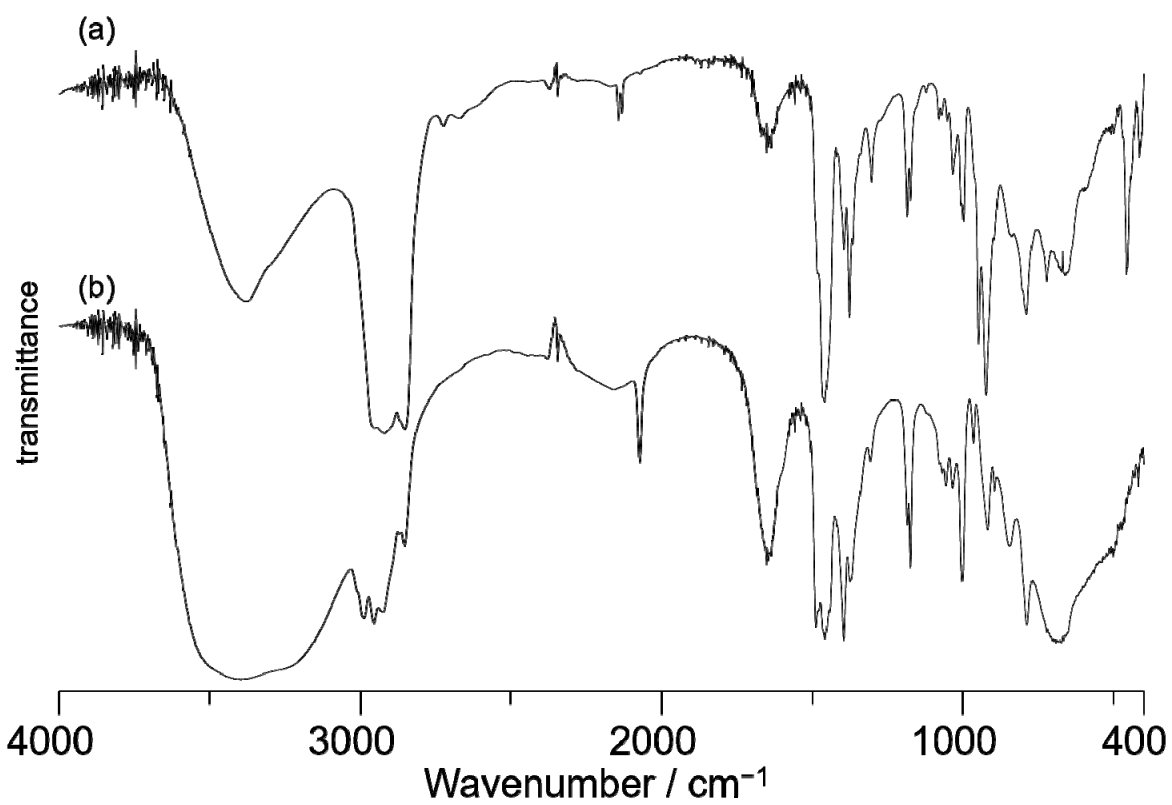

**Figure S4.** IR spectra of (a)  $(\text{Et}_4\text{N})_2[\text{VO}_2(\text{CN})_3]$  and (b)  $\text{Et}_4\text{NCN}$ . Data are recorded with a nujol method.

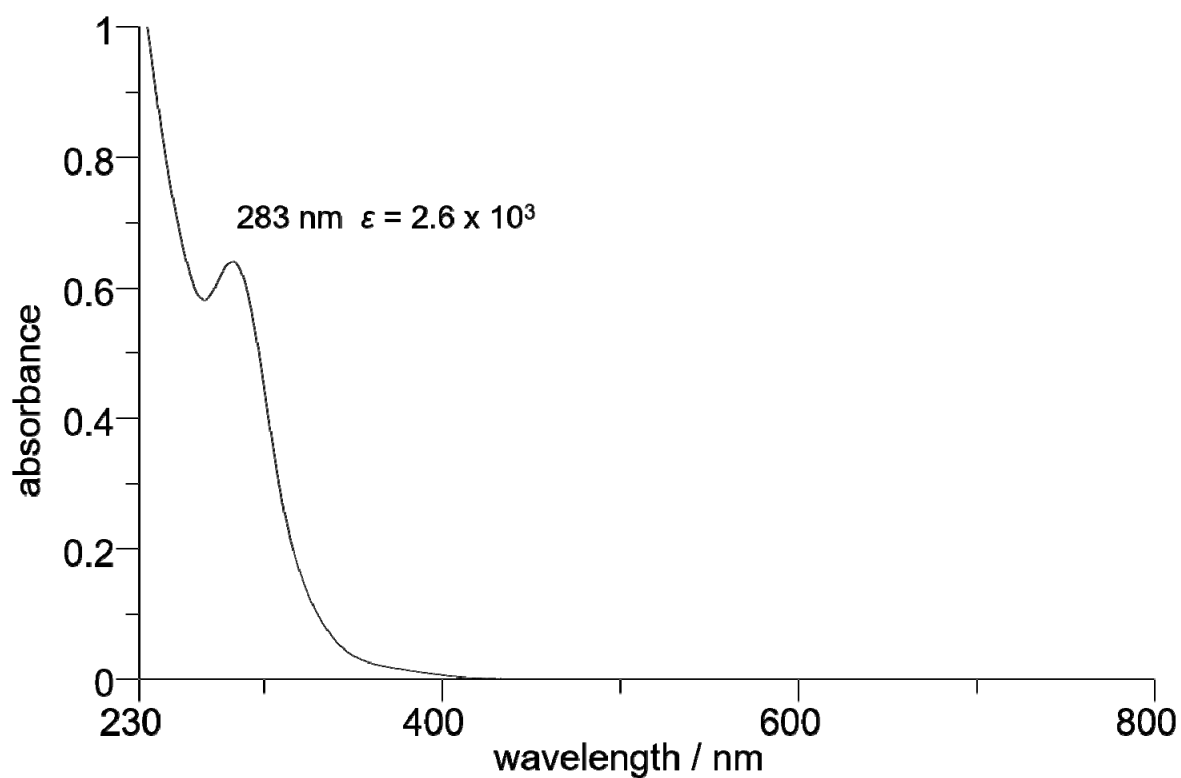

**Figure S5.** UV spectrum of  $(\text{Et}_4\text{N})_2[\text{VO}_2(\text{CN})_3]$  in acetonitrile. The concentration of  $(\text{Et}_4\text{N})_2[\text{VO}_2(\text{CN})_3]$  was 0.25 M.
